# Supplementary material for: Should I stay or should I go? The settlement-inducing protein complex guides barnacle settlement decisions
Source: Oxford University Press journal article supplement (doi:10.1242/jeb.185348), 2018-01-01
Supplement: jeb185348supp.pdf [file jeb185348supp.pdf]

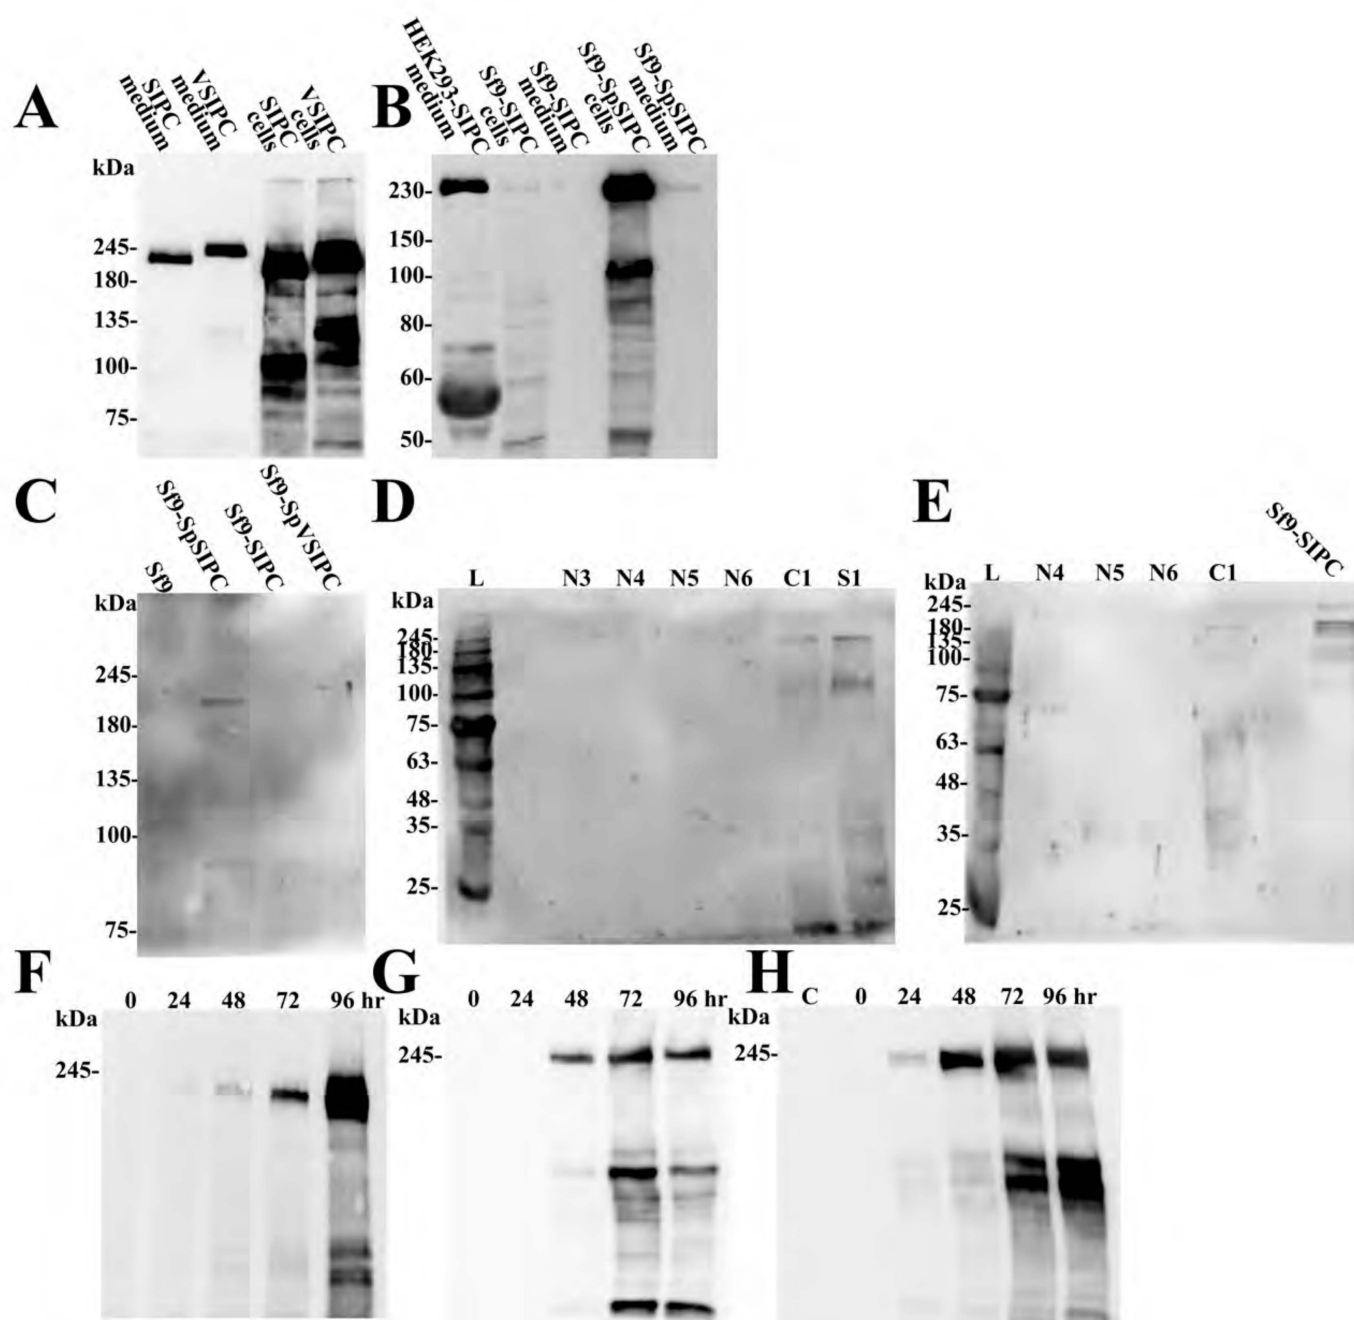

**Fig. S1:** Expression of recombinant SIPC from *A. amphitrite*.

**A:** Recombinant SIPC and VSIPC are secreted by HEK293 cells. Gel loading and Western blots conditions are identical to Fig. 1A. A typical image of several blots (n=4) is shown.

**B:** An engineered signal peptide in recombinant SIPC (SpSIPC) results in secretion of SIPC by insect Sf9 cells. Gel loading and Western blots conditions are identical to Fig. 1A. A typical image of several blots (n=3) is shown.

**C:** Detection of recombinant SIPC with a rabbit anti-SIPC polyclonal antibody. Each lane contains 20  $\mu$ l of Sf9 cell culture medium. A typical image of several blots (n=3) is shown.

**D:** Detection of native SIPC, in extracts from *A. amphitrite* different developmental stages, with a rabbit anti-SIPC polyclonal antibody. Each lane contains 10 µg of total cellular protein from different developmental stages of this species. A typical image of several blots (n=3) is shown. N3 to N6: Nauplii stage 3 to stage 6, C1: Cyprid day 1, S1: Settled day 1, L: Protein Ladder.

**E:** Native SIPC has a MW similar to recombinant SIPC. Each lane contains 10 µg of total cellular protein from different developmental stages of *A. amphitrite* or 20 µl of Sf9 cell culture medium. A typical image of several blots (n=3) is shown. N4 to N6: Nauplii stage 4 to stage 6, C1: Cyprid day 1.

**F:** Time course of expression of recombinant SpSIPC by Sf9 cells after infection with recombinant SpSIPC-expressing baculoviruses. Each lane contains 10 µg of total cellular protein from Sf9 cells.

**G:** Time course of expression of recombinant VSpSIPC by Sf9 cells after infection with recombinant VSpSIPC-expressing baculoviruses. Each lane contains 10 µg of total cellular protein from Sf9 cells.

**H:** Time course of secretion of recombinant VSpSIPC from Sf9 cells after infection with recombinant VSpSIPC-expressing baculoviruses. Each lane contains 20 µl of Sf9 cell culture medium. Western blots were probed with an anti-myc antibody and a typical image of several blots (n=3) is shown.

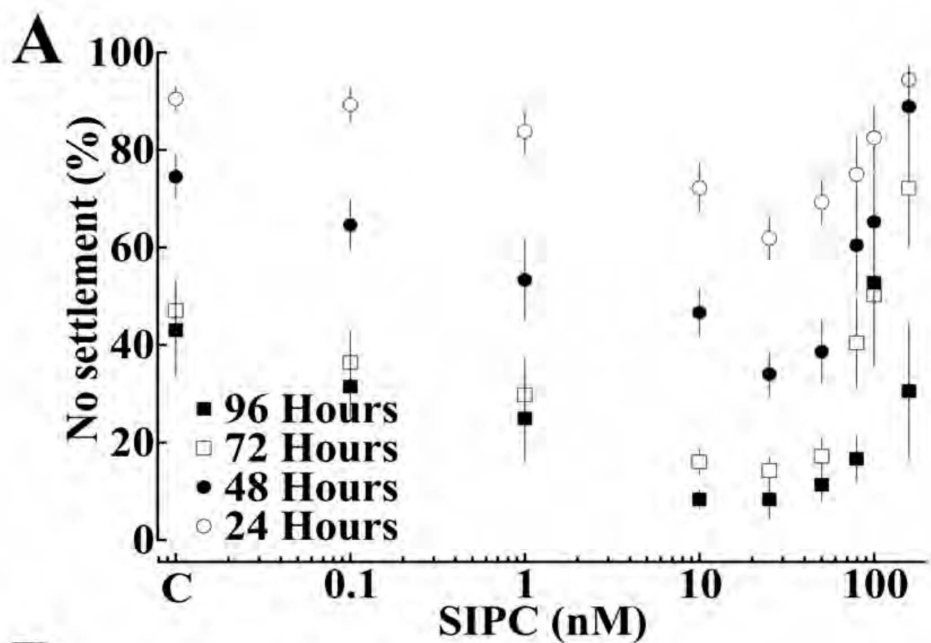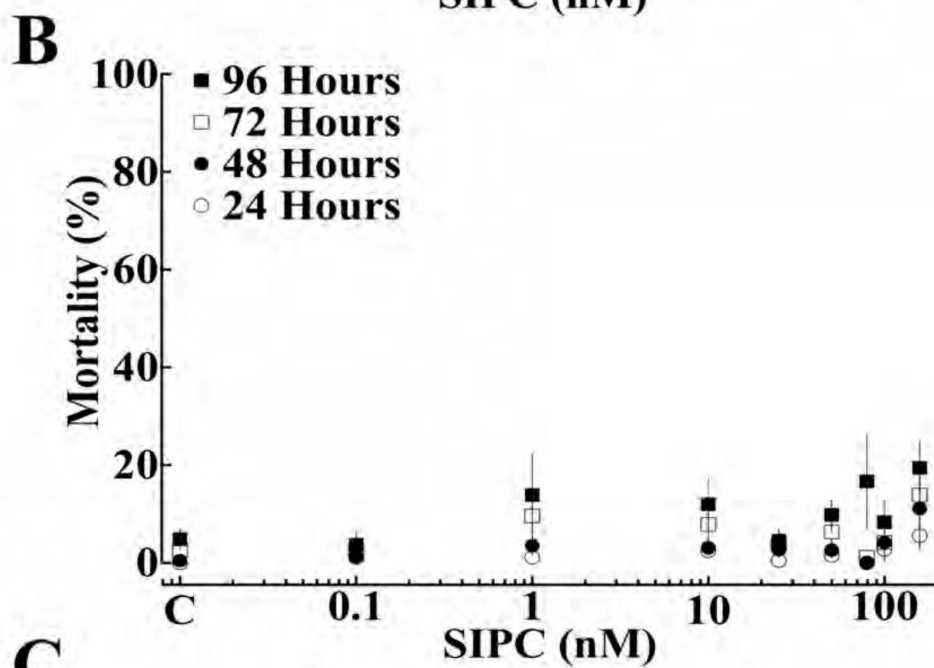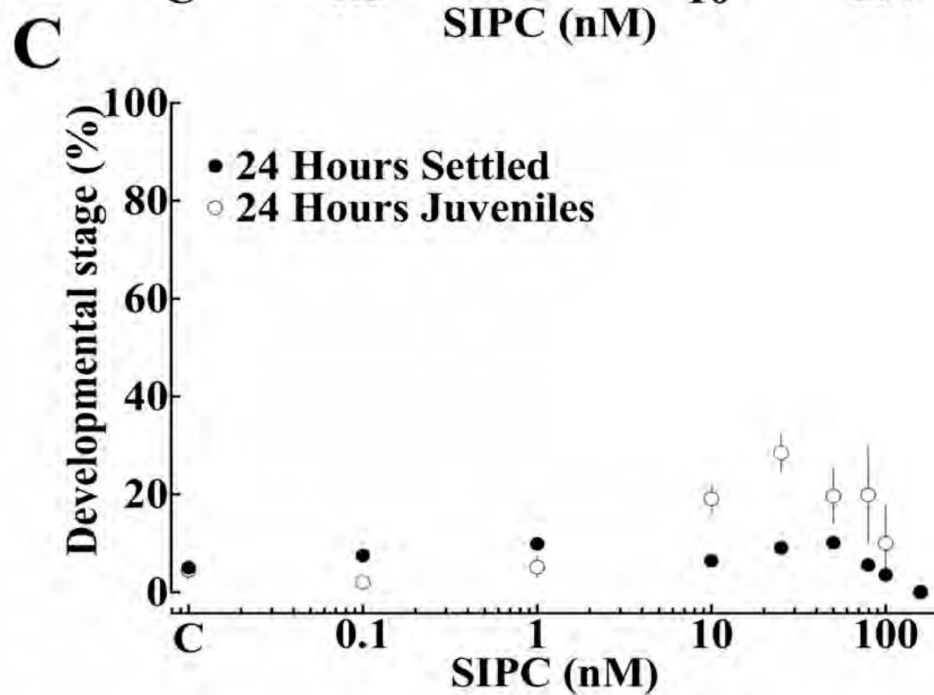

## Fig. S2

**A:** High concentrations of recombinant SIPC induce settlement avoidance by *A. amphitrite* cyprids. Values are expressed as the percentage of animals that settled from the total number of animals placed in a well of a 24-well tissue culture plate. The cumulative results from 3 independent experiments with 5 replicates each is shown. See statistical analysis in legend of Figure 2A.

**B:** Recombinant SIPC does not have any effect on mortality of *A. amphitrite* cyprids in settlement assays. Values are expressed as the percentage of animals that settled from the total number of animals placed in a well of a 24-well tissue culture plate. The cumulative results from 3 independent experiments with 5 replicates each is shown. Results of one-way ANOVA with the Tukey's multiple comparisons test between matched observations for the various time points revealed no statistical significance between the datasets ( $p=0.0753$ ). Results of one-way ANOVA with the Bonferonni's multiple comparisons test between control and the various concentrations of recombinant SIPC (SpSIPC) revealed no statistical significance ( $p>0.05$ ) in all 4 tested time points.

**C:** Recombinant SIPC induces settlement and concomitant metamorphosis within 24 hrs in *A. amphitrite* cyprids. Values are expressed as the percentage of animals that settled from the total number of animals placed in a well of a 24-well tissue culture plate. The cumulative results from 3 independent experiments with 5 replicates each is shown. Results of unpaired, one-tailed t-tests between the percentages of settled and metamorphosed animals revealed that SpSIPC did not induce metamorphosis of the animals within 24 hrs ( $p=0.06$ ).

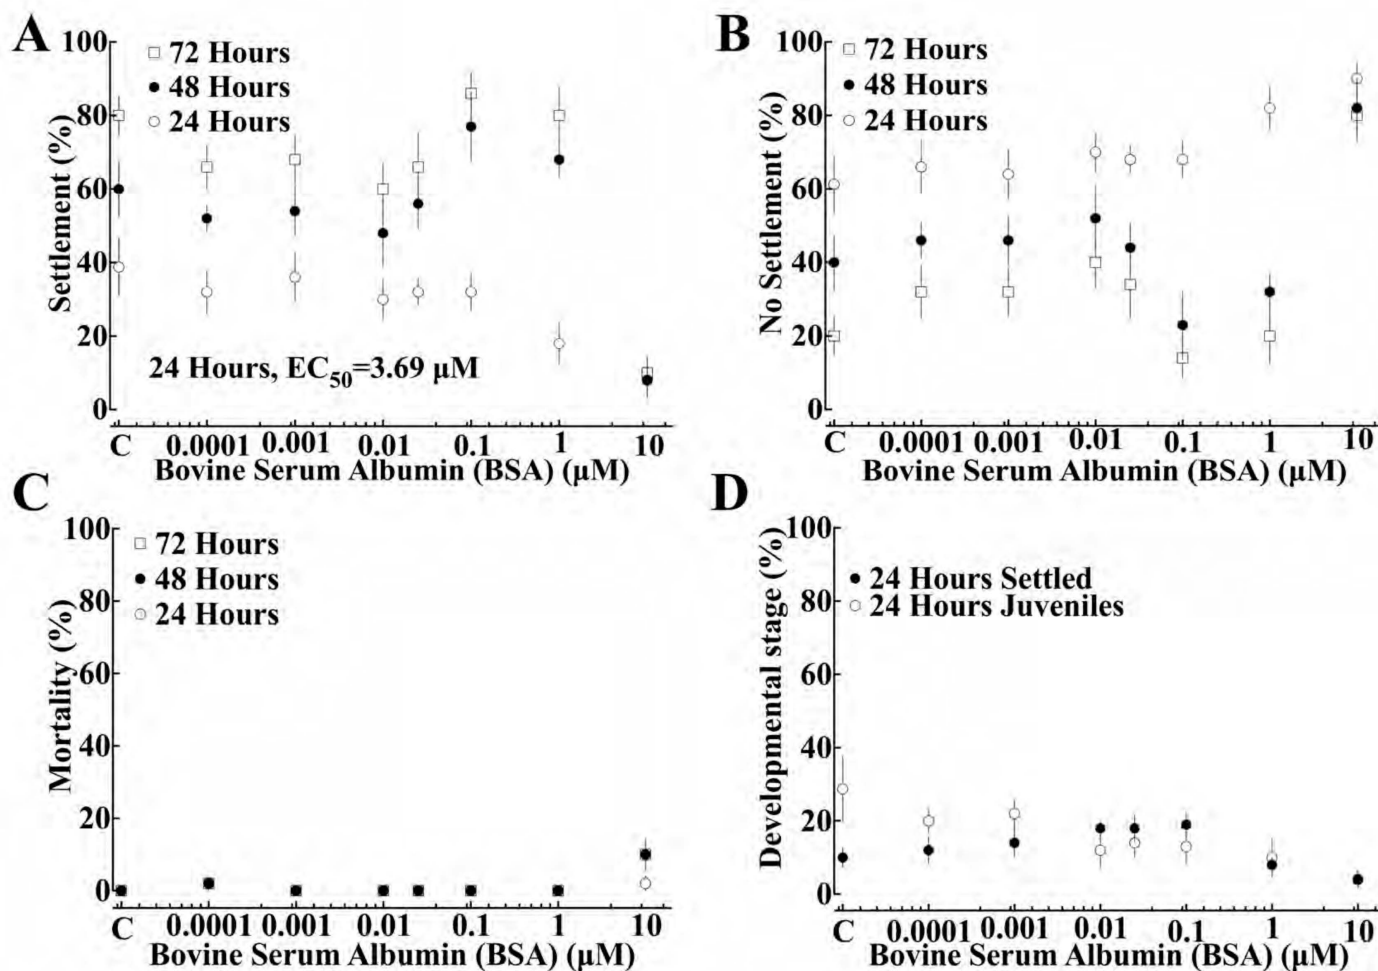**Fig. S3**

**A:** Effect of Bovine Serum Albumin (BSA) on settlement behaviour of *A. amphitrite* cyprids. Values are expressed as the percentage of animals that settled from the total number of animals placed in a well of a 24-well tissue culture plate. The cumulative results from 3 independent experiments with 5 replicates each is shown. Results of one-way ANOVA with the Tukey's multiple comparisons test between matched observations for the various time points revealed statistical significance between all datasets ( $p < 0.05$ ). Results of one-way ANOVA with the Bonferonni's multiple comparisons test between control and the various concentrations of BSA revealed that BSA inhibited settlement only at a concentration of 10  $\mu\text{M}$  and at 48 and 72 hrs.

**B:** Only concentrations of 10  $\mu\text{M}$  of Bovine Serum Albumin (BSA) inhibit settlement of *A. amphitrite* cyprids. Values are expressed as the percentage of animals that settled from the total number of animals placed in a well of a 24-well tissue culture plate. The cumulative results from 3 independent experiments with 5 replicates each is shown. Results of one-way ANOVA with the Tukey's multiple comparisons test between matched observations for the various time points revealed statistical significance between all datasets ( $p < 0.05$ ). Results of one-way ANOVA with the Bonferonni's multiple comparisons test between control and the various concentrations of BSA revealed that BSA inhibited settlement only at a concentration of 10  $\mu\text{M}$  at 24, 48 and 72 hrs.

**C:** Bovine Serum Albumin (BSA) does not have any effect on mortality of *A. amphitrite* cyprids in settlement assays. Values are expressed as the percentage of animals that settled from the total number of animals placed in a well of a 24-well tissue culture plate. The cumulative results from 3 independent experiments with 5 replicates each is shown. Results of one-way ANOVA with the Tukey's multiple comparisons test between matched observations for the various time points revealed no statistical significance between all datasets ( $p > 0.05$ ). Results of one-way ANOVA with the Bonferonni's multiple comparisons test between control and the various concentrations of BSA revealed that BSA increased mortality rates of cyprids only at a concentration of 10  $\mu\text{M}$  and at 48 and 72 hrs.

**D:** Bovine Serum Albumin (BSA) does not have any effect on settlement and concomitant metamorphosis within 24 hrs in *A. amphitrite* cyprids. Values are expressed as the percentage of animals that settled from the total number of animals placed in a well of a 24-well tissue culture plate. The cumulative results from 3 independent experiments with 5 replicates each is shown. Results of unpaired, one-tailed t-tests between the percentages of settled and metamorphosed animals revealed that BSA did not promoted metamorphosis of the animals within 24 hrs ( $p = 0.225$ ).

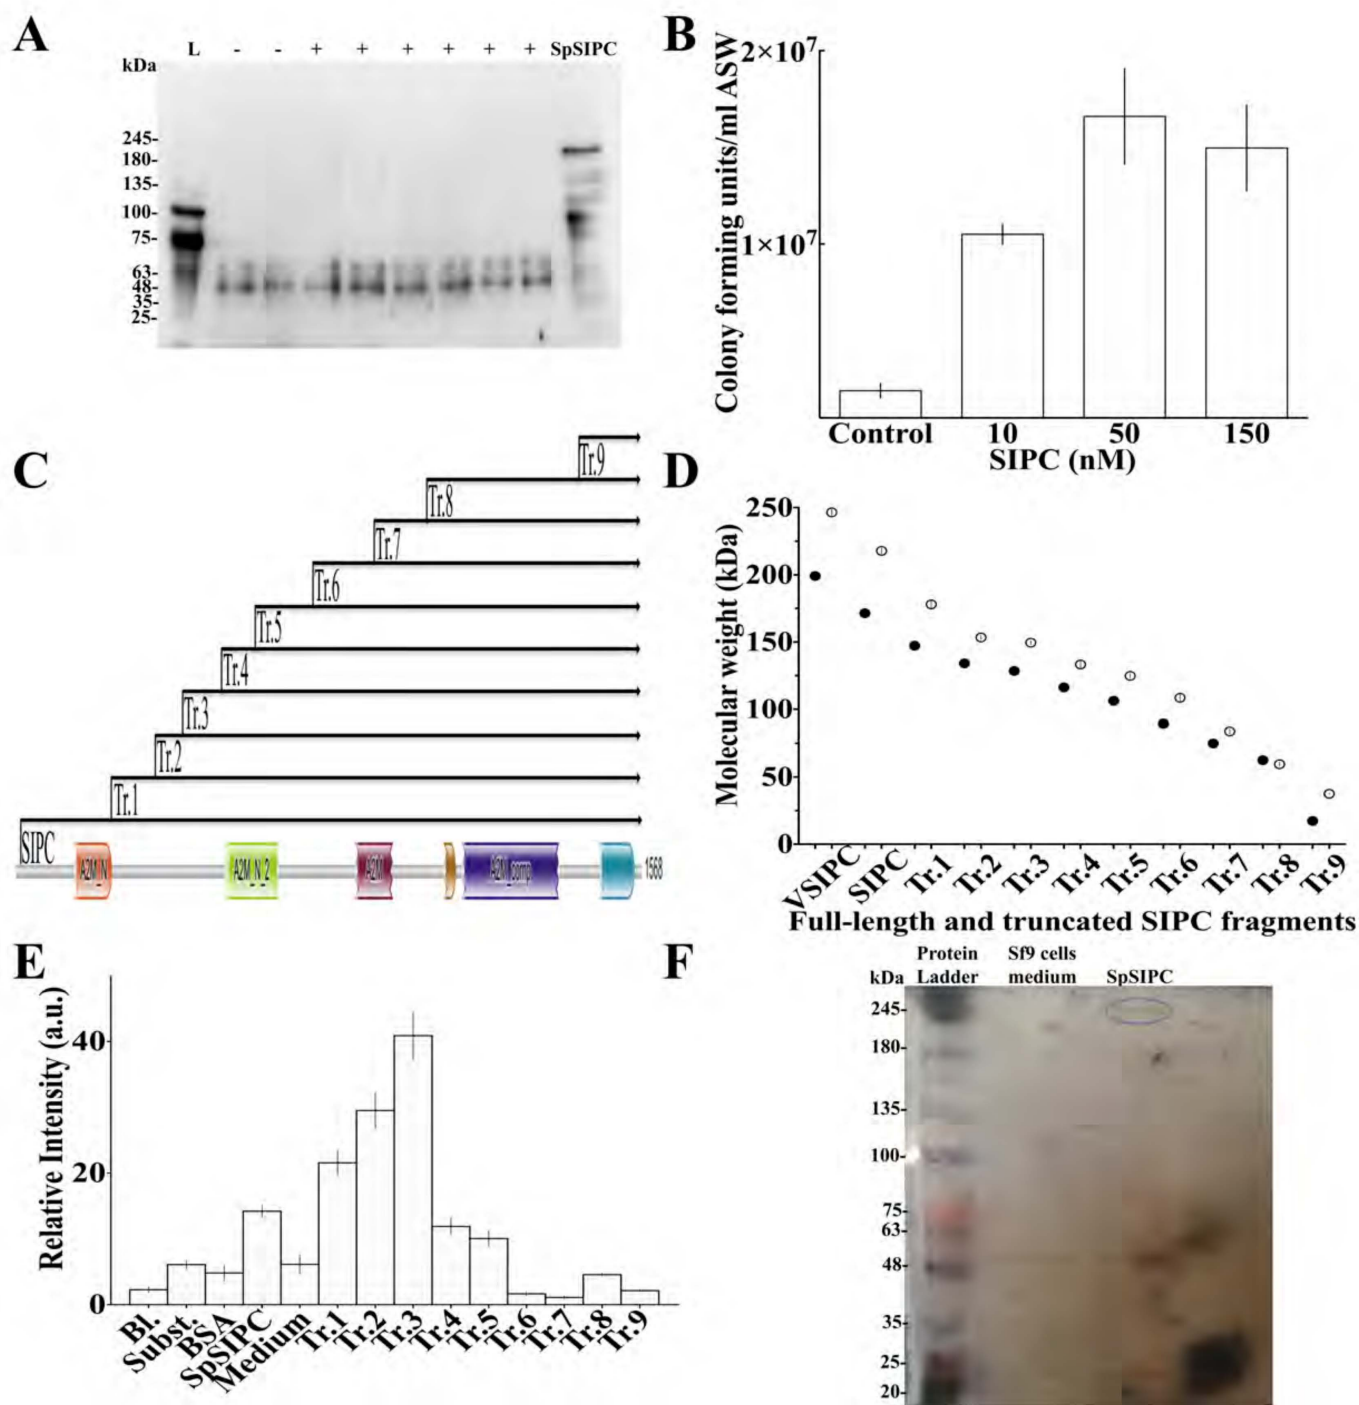

**Fig. S4**

**A:** Native SIPC is not an ASW-diffusible moiety. Trichloroacetic acid (TCA)-precipitated proteins from wells of tissue culture plates used in behavioural bioassays were resolved in 8% SDS-PAGE gels and Western blots were carried out with a mouse anti-SIPC monoclonal antibody as described in the Methods section. For each lane the (+) symbol indicates wells that contained 10 cyprids/2 ml of ASW and the (-) symbol indicates wells that contained no cyprids of *A. amphitrite*. An unknown protein of ~ 48 kDa immunoreacts with the mouse anti-SIPC monoclonal antibody. The supernatant of Sf9 cells expressing SpSIPC (20 µl) was used as a positive control. A typical image of several blots (n=3) is shown.

**B:** Bacterial growth in ASW used in behavioural bioassays in the presence or absence of recombinant SIPC. The spread plate counting technique was used to identify bacterial growth in behavioural bioassays in the absence or presence of the indicated concentrations of SIPC. Results are expressed as colony forming units/ml of ASW. ANOVA analysis showed that bacteria introduced by cyprids do not affect the behavioural response of the cyprids to SIPC ( $p>0.05$ ). The cumulative results from 2 independent experiments with 3 replicates each is shown.

**C:** Graphical representation of the pfam domains present in SIPC and the various truncated SIPC fragments. Pfam domains were visualized via HMMER at <https://www.ebi.ac.uk/Tools/hmmer/search/phmmer> and the length of the truncated SIPC fragments is shown.

**D:** Calculated (closed circles) and apparent (open circles) MW of SIPC and its truncated fragments quantified by western blots. Western blots were probed with an anti-myc antibody and the cumulative data from several blots ( $n=3-7$ ) is shown.

**E:** Adhesive properties of recombinant SIPC and truncated SIPC fragments to the surface of polystyrene tissue culture plates used in behavioural bioassays. Sterile tissue culture plates were incubated at 25 °C for 24 hrs empty (Bl.) or with 0.3 ml of BSA (10  $\mu$ M), SpSIPC (50 nM), HEK293 cell culture medium (medium) or purified truncated SIPC fragments (Tr.1 to Tr.9, 50 nM each). Solutions were then aspirated and western blots were carried out on the wells with a Myc-Tag (9B11) mAb (Cell Signaling Technology) as described in the Methods section. In a set of wells (Subst.) only LumiGLO<sup>®</sup> chemiluminescence reagent was added. A typical image of several experiments ( $n=3$ ) is shown. Acquired high resolution images were analysed with ImageJ 1.48v (NIH, USA) and data was exported and statistically analysed with GraphPad Prism v.6. Results are expressed as arbitrary units (a.u.) of relative intensity as determined by the ImageJ 1.48v software.



**F:** Purified recombinant SIPC is a high molecular weight protein. An SDS-PAGE gel was silver stained (see Methods section) and a band (denoted by a circle) was excised and subjected to LC-MS/MS. See ProteomeXchange Consortium dataset identifier PXD006858 and 10.6019/PXD006858 for detailed results.

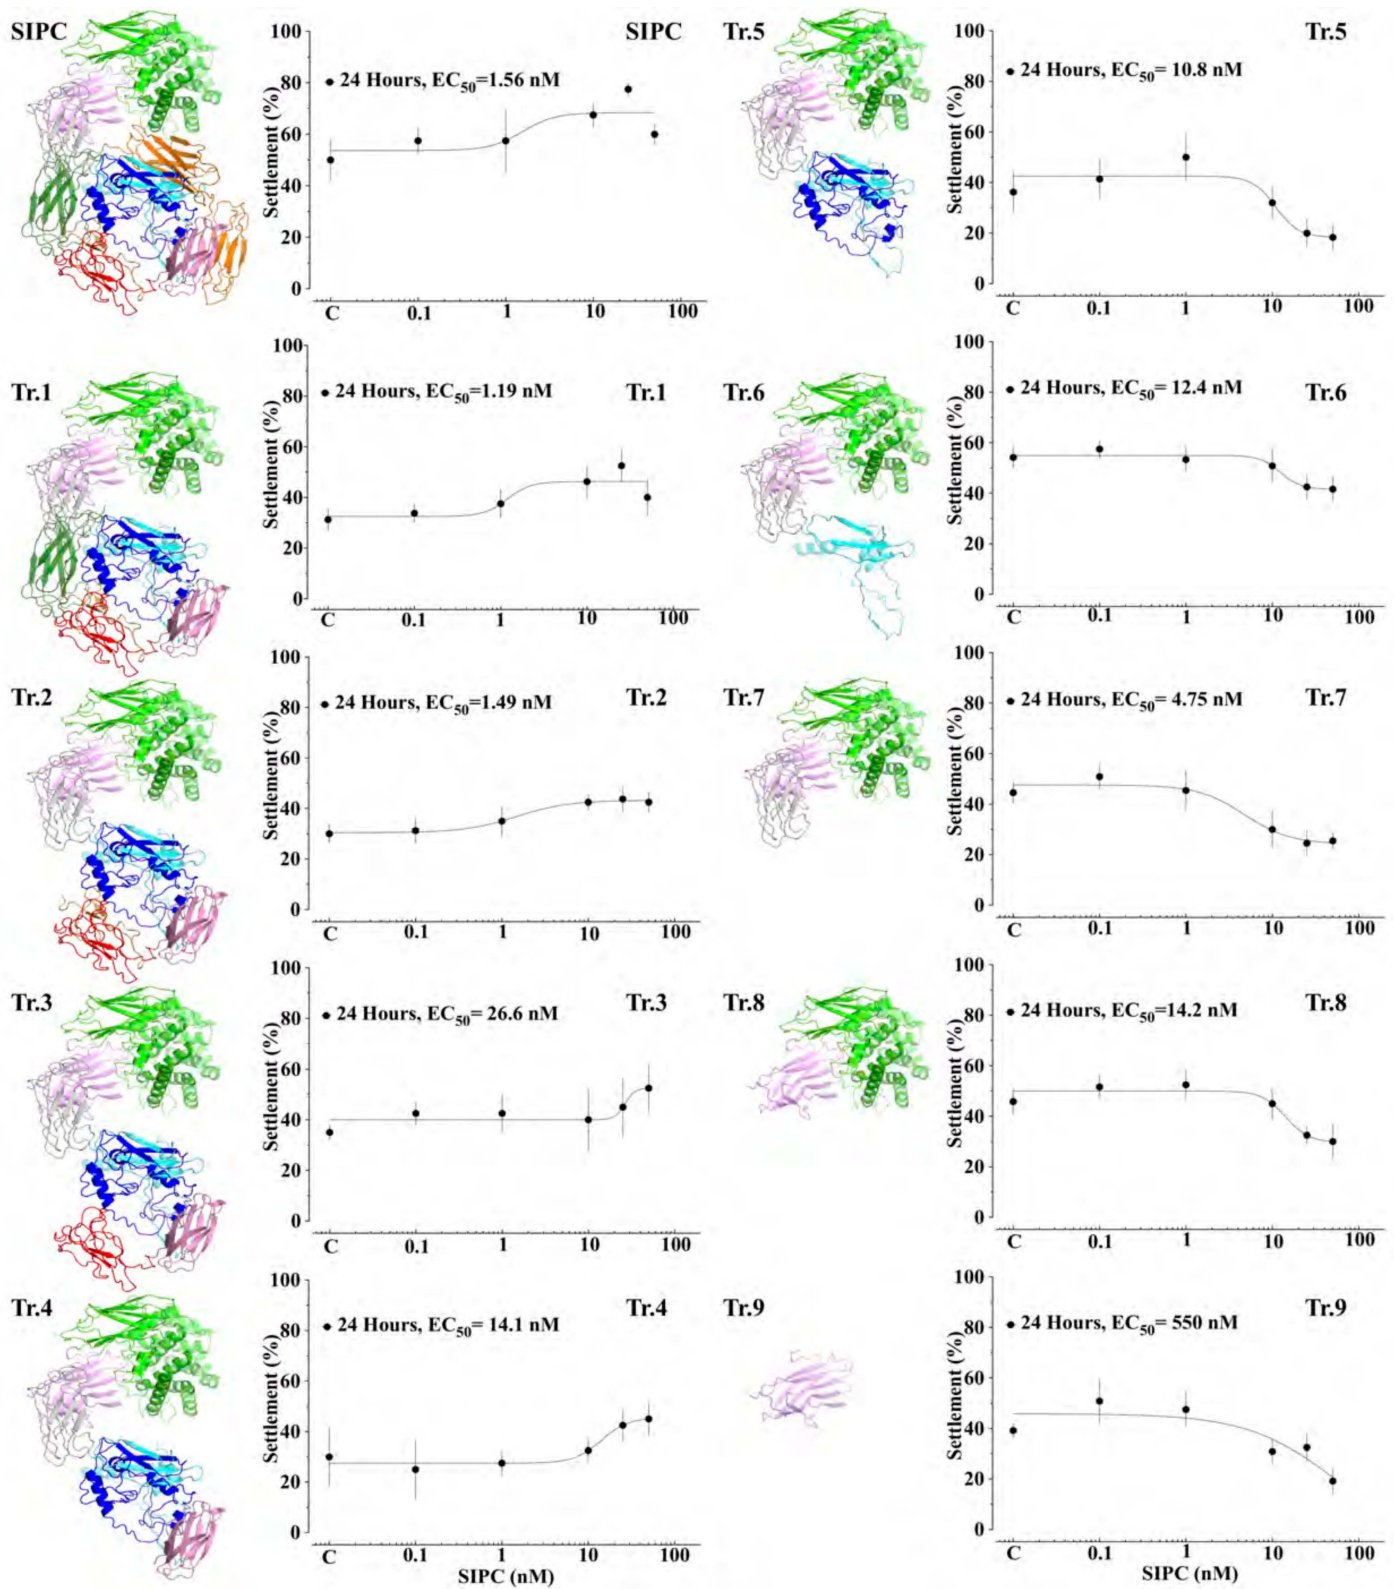

### **Fig. S5**

Recombinant truncated SIPC fragments transduce gregarious settlement preference or settlement avoidance behaviour by *A. amphitrite* cyprids. Values are expressed as the percentage of animals that settled from the total number of animals placed in a well of a 24-well tissue culture plate. The cumulative results from 2 independent experiments with 4 replicates each is shown. On the left of each graph, the crystal structure simulation of SIPC or its truncated fragments is shown for visual clarity.

**Table S1:** Alignment of the open reading frame from 3 cDNA sequences of *A. amphitrite* SIPC using the multiple sequence alignment software MAFFT at <http://www.ebi.ac.uk/Tools/msa/mafft/>. Bold letters in red indicate the differences between the nucleotide sequences.

CLUSTAL format alignment by MAFFT FFT-NS-i (v7.215)

|                    |                                                                                                           |
|--------------------|-----------------------------------------------------------------------------------------------------------|
| Kotsiri et al SIPC | ATGGGT <b>CGGGCCA</b> TCGT <b>G</b> TTTCTACTGGTCGC <b>T</b> TTGGCGACGGCAAGCGCCGTCAAGGTC                   |
| Dreanno et al SIPC | ATGGGTGGTCCCGTCGTCTACTGGTCGCCTTGGCGACGGCAAGCGCCGTCAAGGTC                                                  |
| Zhang et al SIPC   | ATGGG <b>AT</b> -----CCGTCAAGGTC                                                                          |
|                    | ***** <span style="float: right;">*****</span>                                                            |
| Kotsiri et al SIPC | CCCGAAAGCGGGTACCTGTTACGGCACCCAAAGTACT <b>T</b> CAGGCTGGCACAGATGAACGT                                      |
| Dreanno et al SIPC | CCCGAAAGCGGGTACCTGTTACGGCACCCAAAGTACTCCAGGCTGGCACAGATGAACGT                                               |
| Zhang et al SIPC   | CCCGAAAGCGGGTACCTGTTACGGCACCCAAAGTACTCCAGGCTGGCACAGATGAACGT                                               |
|                    | *****.*****                                                                                               |
| Kotsiri et al SIPC | GCCTGCCTCAGTCTGTTCAACCTACCCGG <b>G</b> CCGAA <b>T</b> CG <b>C</b> GC <b>T</b> CTCAAGCTGAAGTTCTAC          |
| Dreanno et al SIPC | GCCTGCCTCAGTCTGTTCAACCTACCCGGACCGAACCCTGCGCTCAAGCTGAAGTTCTAC                                              |
| Zhang et al SIPC   | GCCTGCCTCAGTCTGTTCAACCTACCCGGACCGAACCCTGCGCTCAAGCTGAAGTTCTAC                                              |
|                    | *****.*****.***.***.*****                                                                                 |
| Kotsiri et al SIPC | GAGCGCGACGTTCCAAGCAGTCTGTGACCCAGCTAGATAAGAGCGATTCCTGCTGTTT                                                |
| Dreanno et al SIPC | GAGCGCGACGTTCCAAGCAGTCTGTGACCCAGCTAGATAAGAGCGATTCCTGCTGTTT                                                |
| Zhang et al SIPC   | GAGCGCGACGTTCCAAGCAGTCTGTGACCCAGCTAGATAAGAGCGATTCCTGCTGTTT                                                |
|                    | *****                                                                                                     |
| Kotsiri et al SIPC | GAGACAAACAC <b>T</b> GCAGTGCC <b>A</b> GACAGCGTAGCAGAGAATGGAGAGTACTG <b>T</b> TCGACAT <b>C</b>            |
| Dreanno et al SIPC | GAGACAAACACAGCAGTGCCGGACAGCGTAGCAGAGAATGGAGAGTACTGCTTCGACATT                                              |
| Zhang et al SIPC   | GAGACAAACACAGCAGTGCCGGACAGCGTAGCAGAGAATGGAGAGTACTGCTTCGACATT                                              |
|                    | *****.*****.*****.*****.                                                                                  |
| Kotsiri et al SIPC | ACCATTCCATCCAAGGTGGTGGCCCGCAGTGTGACATGCACATGGAGCTGACGGCTGG <b>C</b>                                       |
| Dreanno et al SIPC | ACCATTCCATCCAAGGTGGTGGCCCGCAGTGTGACATGCACATGGAGCTGACGGCTGGT                                               |
| Zhang et al SIPC   | ACCATTCCATCCAAGGTGGTGGCCCGCAGTGTGACATGCACATGGAGCTGACGGCTGGT                                               |
|                    | *****.                                                                                                    |
| Kotsiri et al SIPC | GAAGGCGTCTGGAAGGAGGAGT <b>C</b> CGTGGTGACTCTGAAATCGGAGACGTTCCCTGACGCTG                                    |
| Dreanno et al SIPC | GAAGGCGTCTGGAAGGAGGAGTCTGTGGTGACTCTGAAATCGGAGACGTTCCCTGACGCTG                                             |
| Zhang et al SIPC   | GAAGGCGTCTGGAAGGAGGAGTCTGTGGTGACTCTGAAATCGGAGACGTTCCCTGACGCTG                                             |
|                    | *****.*****                                                                                               |
| Kotsiri et al SIPC | GTT <b>C</b> AGACGGACAAGTCCAAGTACCAGCCTGGT <b>C</b> AGAAGGTGCTCTT <b>C</b> AGAGTG <b>G</b> TTACC <b>G</b> |
| Dreanno et al SIPC | GTT <b>C</b> AGACGGACAAGTCCAAGTACCAGCCTGGT <b>C</b> AGAAGGTGCTCTT <b>C</b> AGAGTG <b>G</b> TTACC          |
| Zhang et al SIPC   | GTT <b>C</b> AGACGGACAAGTCCAAGTACCAGCCTGGT <b>C</b> AGAAGGTGCTCTT <b>C</b> AGAGTG <b>G</b> TTACC          |
|                    | *****                                                                                                     |
| Kotsiri et al SIPC | CT <b>C</b> AGTCACGACCTGACCGCCCTCAACAATGACCTGAATGAGGTGTGG <b>G</b> TCACCACTCCG                            |
| Dreanno et al SIPC | CTTAGTCACGACCTGACCGCCCTCAACAATGACCTGAATGAGGTGTGGATCACCACTCCG                                              |
| Zhang et al SIPC   | CTTAGTCACGACCTGACCGCCCTCAACAATGACCTGAATGAGGTGTGGATCACCACTCCG                                              |
|                    | **.******.*****                                                                                           |
| Kotsiri et al SIPC | GACAAC <b>G</b> TCCGCGTGGCCAGTGAAGA <b>A</b> T <b>G</b> T <b>C</b> AAAACCAACACTGGCATGGTGCAGCTG            |
| Dreanno et al SIPC | GACAACATCCGCGTGGCCAGTGAAGA <b>A</b> CGT <b>G</b> AAAACCAACACTGGCATGGTGCAGCTG                              |
| Zhang et al SIPC   | GACAACATCCGCGTGGCCAGTGAAGA <b>A</b> CGT <b>G</b> AAAACCAACACTGGCATGGTGCAGCTG                              |
|                    | *****.******.***.*****                                                                                    |
| Kotsiri et al SIPC | GAACTGCAGCTGACCGAGGAGCCACCTCTGGGCTCGTGGACAATTCACGTGC <b>G</b> ACTACC                                      |
| Dreanno et al SIPC | GAACTGCAGCTGACCGAGGAGCCACCTCTGGGCTCGTGGACAATTCACGTGCTGACTACC                                              |
| Zhang et al SIPC   | GAACTGCAGCTGACCGAGGAGCCACCTCTGGGCTCGTGGACAATTCACGTGCTGACTACC                                              |
|                    | *****.*****                                                                                               |

Kotsiri et al SIPC CAGGACACCTACACCAAGCGATTTACGGTGGAGGAGTATGTTCTGCCAACATTTGAGCTG  
Dreanno et al SIPC CAGGACACCTACACCAAGCGATTTACGGTGGAGGAGTATGTTCTGCCAACATTTGAGCTG  
Zhang et al SIPC CAGGACACCTACACCAAGCGATTTACGGTGGAGGAGTATGTTCTGCCAACATTTGAGCTG  
\*\*\*\*\*

Kotsiri et al SIPC GAGATCGAGGCACCCGAGTCTCTTGAGAGCAACGAGAAGACTGTCACCGTTAAAGTTTGC  
Dreanno et al SIPC GAGATCGAGGCACCCGAGTCTCTTGAGAGCAACGAGAAGACTGTCACCGTTAAAGTTTGC  
Zhang et al SIPC GAGATCGAGGCACCCGAGTCTCTTGAGAGCAACGAGAAGACTGTCACCGTTAAAGTTTGC  
\*\*\*\*\*

Kotsiri et al SIPC GCAAAGTACACTTTTCGGAAAGCCGCTCATTGCTGCTAACGTGAGCATCAATGCCACAGCT  
Dreanno et al SIPC GCAAAGTACACTTTTCGGAAAGCCGCTTATTGCTGCCAACGTAAGCATCAACGCCACAGCC  
Zhang et al SIPC GCAAAGTACACTTTTCGGAAAGCCGCTTATTGCTGCCAACGTAAGCATCAACGCCACAGCC  
\*\*\*\*\*.\*\*\*\*\*.\*\*\*\*\*.\*\*\*\*\*.\*\*\*\*\*.

Kotsiri et al SIPC AGAGGCATTGGAAGCTGGCAATACAACAATAATAAGGATCTGCTGAGGAATATCTCAGAC  
Dreanno et al SIPC AGAGGCATTGGAAGCTGGCAATACAACAATAATCCGGATCTGCTGAGGAATATCTCAGAC  
Zhang et al SIPC AGAGGCATTGGAAGCTGGCAATACAACAATAATCCGGATCTGCTGAGGAATATCTCAGAC  
\*\*\*\*\* \*\*\*\*\*

Kotsiri et al SIPC TATCA<sup>G</sup>TTTCAGCGACGAGCAGGGATGTGCCATCTTTGACCTGGTGGTCAGCAAGATCGGC  
Dreanno et al SIPC TATCAATTCAGCGACGAGCAGGGATGTGCCATCTTTGACCTGGTGGTCAGCAAGATCGGC  
Zhang et al SIPC TATCAATTCAGCGACGAGCAGGGATGTGCCATCTTTGACCTGGTGGTCAGCAAGATCGGC  
\*\*\*\*\*.\*\*\*\*\*

Kotsiri et al SIPC ATCGGTCATCGCAATATTGGAGGCGGAAATACGGTCATCATCACCATCGATGTGGAAGAG  
Dreanno et al SIPC ATCGGTCATCGTAATATTGGAGGCGGAAATACGGTGATCATCACCATCGATGTGGAAGAG  
Zhang et al SIPC ATCGGTCATCGTAATATTGGAGGCGGAAATACGGTGATCATCACCATCGATGTGGAAGAG  
\*\*\*\*\*.\*\*\*\*\* \*\*\*\*\*

Kotsiri et al SIPC CAGGGTACAGGACTCCGGCAGGT<sup>T</sup>GAGGTCAAGGAGGTCAGTCAAGCGTATTCCCTTCATC  
Dreanno et al SIPC CAGGGTACAGGACTCCGGCAGGTGGAGGTCAAGGAGGTCAGTCAAGCGTATTCCCTTCATC  
Zhang et al SIPC CAGGGTACAGGACTCCGGCAGGTGGAGGTCAAGGAGGTCAGTCAAGCGTATTCCCTTCATC  
\*\*\*\*\* \*\*\*\*\*

Kotsiri et al SIPC AACCTCAGGCAGAGCGACAACGCGCAGAAGTTCCTGAAGCCGAAGCTGCCCTTCTACGGA  
Dreanno et al SIPC AACCTCAGGCAGAGCGACAACGCGCAGAAGTTCCTGAAGCCGAAGCTGCCCTTCTACGGA  
Zhang et al SIPC AACCTCAGGCAGAGCGACAACGCGCAGAAGTTCCTGAAGCCGAAGCTGCCCTTCTACGGA  
\*\*\*\*\*

Kotsiri et al SIPC GAGTACACGCTGAG<sup>C</sup>ATGAGAGATGGTAAGGCTGCGAAGAATGAAATCGTCAAGGTCTGC  
Dreanno et al SIPC GAGTACACGCTGAGTATGAGAGATGGTAAGGCTGCGAAGAATGAAATCGTCAAGGTCTGC  
Zhang et al SIPC GAGTACACGCTGAGTATGAGAGATGGTAAGGCTGCGAAGAATGAAATCGTCAAGGTCTGC  
\*\*\*\*\*.\*\*\*\*\*

Kotsiri et al SIPC TACACAGCCAAGTACAAGGAGAGGGT<sup>A</sup>ATCAGTGACGAGAAGAAGCCAACCTCCCGATGAC  
Dreanno et al SIPC TACACAGCCAAGTACAAGGAGAGGGTCATCAGTGACGAGAAGAAGCCAACCTCCCGATGAC  
Zhang et al SIPC TACACAGCCAAGTACAAGGAGAGGGTCATCAGTGACGAGAAGAAGCCAACCTCCCGATGAC  
\*\*\*\*\* \*\*\*\*\*

Kotsiri et al SIPC CCCGTTTATAGCACACACAAGAAGTACGAGTGCACGTGAAGACCGAGTTCGGCTACACG  
Dreanno et al SIPC CCCGTTTATAGCACACACAAGAAGTACGAGTGCACGTGAAGACCGAGTTCGGCTACACG  
Zhang et al SIPC CCCGTTTATAGCACACACAAGAAGTACGAGTGCACGTGAAGACCGAGTTCGGCTACACG  
\*\*\*\*\*

Kotsiri et al SIPC CCGTTCTTCTGGGAGACTTCGGAGCCCAATCGTGCACACCACCGGTGGCGAATGTGCGGAG  
Dreanno et al SIPC CCGTTCTTCTGGGAGACTTCGGAGCCCAATCG<sup>C</sup>CGCACACCACCGGTGGCGAATGTGCGGAG  
Zhang et al SIPC CCG<sup>C</sup>TCTTCTGGGAGACTTCGGAGCCCAATCGTGCACACCAC<sup>T</sup>GGTGGCGAATGTGCGGAG  
\*\*\*.\*\*\*\*\*.\*\*\*\*\*.\*\*\*\*\*

Kotsiri et al SIPC TATAAACAGACGAAAACGGTCGTATCGTCTACTATATCCCACCACAGGCTGAGGACATC

Dreanno et al SIPC  
Zhang et al SIPC  
TATAAAACAGACGAAAACGGTTCGTATCGTCTACTATATCCCACCACAGGCTGAGGACATC  
TATAAAACAGACGAAAACGGTTCGTATCGTCTACTATATCCCACCACAGGCTGAGGACATC  
\*\*\*\*\*

Kotsiri et al SIPC  
Dreanno et al SIPC  
Zhang et al SIPC  
GACTCCATTGACATCTCGACTTCTACCAGCGTCGGTGGCGATTCTGACAGCTCGCACTCC  
GACTCCATTGACATCTCGACTTCTACCAGCGTCGGTGGCGATTCTGACAGCTCGCACTCC  
GACTCCATTGACATCTCGACTTCTACCAGCGTCGGTGGCGATTCTGACAGCTCGCACTCC  
\*\*\*\*\*

Kotsiri et al SIPC  
Dreanno et al SIPC  
Zhang et al SIPC  
ACGCTAACGGCGTTCTTCTCGCCTTCCCCTCGTACCTAAGCATCGACACGCACGAACTT  
ACGTTGACGGCGTTCTTCTCGCCTTCCCCTCGTACCTAAGCATCGACGCGCACGAACTT  
ACGTGACGGCCTTCTTCTCGCCTTCCCCTCGTACCTGAGCATCGACGCGCACGAACTT  
\*\*\*.\*\*\*\*\*.\*\*\*\*\*.\*\*\*\*\*

Kotsiri et al SIPC  
Dreanno et al SIPC  
Zhang et al SIPC  
CCCGAACAGCTGCCCTGCTCCGGAGATGTCCTGTGAAACTGCTCTCAACTGAGGAGGGA  
CCCGAACAGCTGCCCTGCTCCGGAGATGTCCTGTGAAACTGCTCTCAACTGAGGAGGGA  
CCTGAACAGCTGCCCTGCTCCGGAGACGTCCTGTGAAACTGCTCTCAACTGAGGAGGGA  
\*\*.\*\*\*\*\*\*.\*\*\*\*\*

Kotsiri et al SIPC  
Dreanno et al SIPC  
Zhang et al SIPC  
CCGGTGCCAGCCATGGTTTACAAGATTCTGTCCCAGGCAAGATCATCAAGGCGGGCAAC  
CCGGTGCCAGCCATGGTTTACAAGATTCTGTCCCAGGCAAGATCATCAAGGCGGGCAAC  
CCGGTGCCAGCTATGGTTTACAAGATTCTGTCCCAGGCAAGATCATCAAGGCGGGCAAC  
\*\*\*\*\*.\*\*\*\*\*.\*\*\*\*\*

Kotsiri et al SIPC  
Dreanno et al SIPC  
Zhang et al SIPC  
ATGAACACTAACACGCTGACGTTCCCCTGCTGCCCAAGATGGGCCCCGAGTTCAAGCTG  
ATGAACACTAACACGCTGACGTTCCCCTGCTGCCCAAGATGGGCCCCGAGTTCAAGCTG  
ATGAACACTAATACGCTGACGTTCCCCTGCTGCCCAAGATGGGCCCCGAGTTCAAGCTG  
\*\*\*\*\*.\*\*\*\*\*

Kotsiri et al SIPC  
Dreanno et al SIPC  
Zhang et al SIPC  
CTTGTCTACTACATCAAGGAGAGTGGCGAAGTGGTCAGCGACTCCAGGGTCTTCAAGGTC  
CTTGTCTACTACATCAAGGAGAGTGGCGAAGTGGTCAGCGACTCCAGGGTCTTCAAGGTC  
CTTGTCTACTACATCAAGGAGAGTGGCGAAGTGGTCAGCGACTCCAGGGTCTTCAAGGTC  
\*\*\*\*\*

Kotsiri et al SIPC  
Dreanno et al SIPC  
Zhang et al SIPC  
GACAAGTGCTTCCCCAACACGGTCCAGGTCAGCTGGGATCAGAAGACGGTCAAGCCGGA  
GACAAGTGCTTCCCCAACACTGTTCCAGGTCAGCTGGGATCAGAAGACGGTCAAGCCGGA  
GACAAGTGCTTCCCCAACACTGTTCCAGGTCAGCTGGGATCAGAAGACGGTCAAGCCGGA  
\*\*\*\*\* \*\*.\*\*\*\*\*\*

Kotsiri et al SIPC  
Dreanno et al SIPC  
Zhang et al SIPC  
GACTCTGCTTCGTTACCGTTTCGTGCCTCTCCCAACTCCGTCTGTGGAATCAGCGCTGTG  
GACTCTGCTTCGTTACCGTTTCGTGCCTCTCCCAACTCCGTCTGTGGAATCAGCGCTGTG  
GACTCTGCTTCGTTACCGTTTCGTGCCTCTCCCAACTCCGTCTGTGGAATCAGCGCTGTG  
\*\*\*\*\*

Kotsiri et al SIPC  
Dreanno et al SIPC  
Zhang et al SIPC  
GACAAGAGCACCGAACTTCTGGGCACGTCCAACCAGATCACACTGGATACTGTGTTTCAGC  
GACAAGAGCACCGAACTTCTGGGCACGTCCAACCAGATCACACTGGATAACCGTGTTCAGC  
GACAAGAGCACCGAACTTCTGGGCACGTCCAACCAGATCACACTGGATAACCGTGTTCAGC  
\*\*\*\*\*.\*\*\*\*\*

Kotsiri et al SIPC  
Dreanno et al SIPC  
Zhang et al SIPC  
AAGCTGCAGCAGTTCATCATTAATAGCTTCGAGAGCCCCAACCAGGTCCGAGCGATGGC  
AAGCTGCAGCAGTTCATCATTAATAGCTTCGAGAGCCCCAACCAGGTCCGAGCGATGGC  
AAGCTGCAGCAGTTCATCATTAATAGCTTCGAGAGCCCCAACCAGGTCCGAGCGATGGC  
\*\*\*\*\*

Kotsiri et al SIPC  
Dreanno et al SIPC  
Zhang et al SIPC  
GATTACTGCAGGGAAGCTGCAGCTTTCCTGCTAGACTCTGCGAAGCGGTGGCGCCACG  
GATTACTGCAGGGAAGCTGCAGCTTTCCTGCTAGACTCTGCGAAGCGGTGGCGCCACG  
GATTACTGCAGGGAAGCTGCAGCTTTCCTGCTAGACTCTGCGAAGCGGTGGCGCCACG  
\*\*\*\*\*.\*\*\*\*\*

Kotsiri et al SIPC  
Dreanno et al SIPC  
GACAGCTGAGCTTACTGGTCAGTCCACCCCGGAGGGCACGCCAGAGTCTGAAACCAGCGGA  
GTGGCCGAGCTTACTGGTCAGTCCACCCCGGAGGGCACGCCAGAGTCTGAAACCAGCGGA



Kotsiri et al SIPC  
Dreanno et al SIPC  
Zhang et al SIPC

\*\*\*\*\*.\*\*\*\*\* \*\*\*\*\*.\*\*\*\*.\*\*\*\*  
TTCCCGGTCAACTTCTGGGTCTGGGCGAGGTCAACATCACAGTCACGGCCAGGGCACAG  
TTCCCGGTCAACTTCTGGGTCTGGGCGAGGTCAACATCACAGTCACGGCCAGGGCACAG  
TTCCCGGTCAACTTCTGGGTCTGGGCGAGGTCAACATCACAGTCACGGCCAGGGCACAG  
\*\*\*\*\*

Kotsiri et al SIPC  
Dreanno et al SIPC  
Zhang et al SIPC

GACGGATACTGCGACGAAGGCAACACCATCGCGCCGGGCAGTGACACCGTCATCCGACCA  
GACGGATACTGCGACGAAGGCAACACCATCGCGCCGGGCAGTGACACCGTCATCCGACCA  
GACGGATACTGCGACGAAGGCAACACCATCGCGCCGGGCAGTGACACCGTCATCCGACCA  
\*\*\*\*\*

Kotsiri et al SIPC  
Dreanno et al SIPC  
Zhang et al SIPC

ATCGTCGTCAAACCAGAGGGATTCCCTCAAGA**GGT**GACCCACTCTCGCTTCATCTGTCT**T**  
ATCGTCGTCAAACCAGAGGGATTCCCTCAAGAAGTGACCCACTCTCGCTTCATCTGTCTC  
ATCGTCGT**GAA**ACCAGAGGGATTCCCTCAAGAAGTGACCCACTCTCG**T**TCATCTG**CC**TC  
\*\*\*\*\*.\*\*\*\*\*.\*\*\*\*\*.\*\*\*.

Kotsiri et al SIPC  
Dreanno et al SIPC  
Zhang et al SIPC

GACAAGGATGACGACCACCACACGGAGAC**T**GTGAACCTGCCGGTGCCGGAAGGCCTGGTG  
GACAAGGATGACGACCACCACACGGAGACGGTGAACCTGCCGGTGCCGGAAGGCCTGGTG  
GACAAGGATGACGACCACCACACGGAGACGGTGAACCTGCCGGTGCCGGAAGG**TCTGGTA**  
\*\*\*\*\*.\*\*\*\*\*.

Kotsiri et al SIPC  
Dreanno et al SIPC  
Zhang et al SIPC

CCCGACTCTCAGCGCGCCTACTTCTCCGTCATCGGAGATCTTCTGGGAC**C**GACCTTCCAG  
CCCGACTCTCAGCGCGCCTACTTCTCCGTCATCGGAGATCTT**T**TGGGACAGACCTTCCAG  
CCCGACTCTCAGCGCGCCTACTTCTCCGTCATCGGAGATCTTCTGGGACAGACCTTCCAG  
\*\*\*\*\*.\*\*\*\*\*.\*\*\*\*\*

Kotsiri et al SIPC  
Dreanno et al SIPC  
Zhang et al SIPC

GGTCTTGAGGGAGGTCTCATTAAAGTCGCCTACCGGCGCCGGTGAGCCCAACATGATCACT  
GGTCT**G**GAGGGAGGTCTCATTAAAGTCGCCTACCGGCGCCGGTGAGCCCAACATGATCACT  
GGTCTTGAGGGAGGTCTCATTAAAGTCGCCTACCGGCGCCGGTGAGCCCAACATGATCACT  
\*\*\*\*\*.\*\*\*\*\*.\*\*\*\*\*

Kotsiri et al SIPC  
Dreanno et al SIPC  
Zhang et al SIPC

CTGGTGCCCAATATCTACATCCGTCGCTACCTGGAGACAACCTGGTCAGCTCAACGAGCGT  
CTGGTGCCCAATATCTACATCCGTCGCTACCTGGAGACAACCTGGTCAGCTCAACGAGCGT  
CTGGTGCCCAATATCTACATCCGTCGCTACCTGGAGACAACCTGGTCAGCTCAACGAGCGT  
\*\*\*\*\*

Kotsiri et al SIPC  
Dreanno et al SIPC  
Zhang et al SIPC

CAGAGACG**G**CAGCTAG**A**ACACAACATGAAGAGCGG**T**TACCAGCGCCAGTTGCGCTTCAGG  
CAGAGACGACAGCTAGAGCACAACATGAAGAGCGGCTACCAGCGCCAGTTGCGCTTCAGG  
CAGAG**G**CGACAGCTAGAGCACAACATGAAGAGCGGCTACCAGCGCCAGTTGCGCTTCAGG  
\*\*\*\*\*.\*\*\*.\*\*\*\*\*.\*\*\*\*\*.\*\*\*\*\*.\*\*\*\*\*

Kotsiri et al SIPC  
Dreanno et al SIPC  
Zhang et al SIPC

CGGTACGATGGCTCGTTCTCGTCGTACGGAAATGAGGACCCTCAGGGCTCCATGTGGCTC  
CGGTACGATGGCTCGTTCTCGTCGTACGGAAATGAGGACCCTCAGGGCTCCATGTGGCTC  
CGGTACGATGG**T**CGTTCTCGTCGTACGGAAATGAGGACCCTCAGGGCTCCATGTGGCTC  
\*\*\*\*\*.\*\*\*\*\*.\*\*\*\*\*

Kotsiri et al SIPC  
Dreanno et al SIPC  
Zhang et al SIPC

ACTGCCTTCGTTGTCAAGGCCTTCCGCGAGGCGTCCGAGTACATCGAAATCGATGAGACT  
ACTGCCTTCGTTGTCAAGGCCTTCCGCGAGGCGTCCGAGTACATCGAAATCGATGAGACT  
AC**C**GCCTT**T**GTTGTCAAGGCCTTCCGCGAGGCGTCCGAGTACATCGAAATCGATGAGACT  
\*\*.\*\*\*\*\*.\*\*\*\*\*.\*\*\*\*\*.\*\*\*\*\*.\*\*\*\*\*

Kotsiri et al SIPC  
Dreanno et al SIPC  
Zhang et al SIPC

ATTATCAACAAGGCTAAGGACTGGATTCTGAAGAAACAGAACACTACTGGCTGTTTCCCG  
ATTATCAACAAGGCTAAGGACTGGATTCTGAAGAAACAGAACACTACTGGCTGTTTCCCG  
ATTAT**T**AACAAGGCTAAGGACTGGATTCTGAAGAAACAGAACACTACTGGCTGTTTCCCG  
\*\*\*\*\*.\*\*\*\*\*.\*\*\*\*\*.\*\*\*\*\*.\*\*\*\*\*

Kotsiri et al SIPC  
Dreanno et al SIPC  
Zhang et al SIPC

AGGTTCCGGCGAGCTTATTCACAAGGAGCTGAAGGGTGGCACCAGCGAGGCGGTTGAAGCG  
AGGTTCCGGCGAGCTTATTCACAAGGAGCTGAAGGGTGGCACCAGCGAGGCGGTTGAAGCG  
AGGTTCCGGCGAGCTTATTCACAAGGAGCTGAAGGGTGGCACCAGCGAGGCGGTTGAAGCG  
\*\*\*\*\*



Kotsiri et al SIPC  
Dreanno et al SIPC  
Zhang et al SIPC  
GCCCTCACGGCCTTCGTCATGTTGGCTCTGAAGGACATCGCAACCACTAATGAGCTGGCC  
GCCCTCACGGCCTTCGTCATGTTGGCTCTGAAGGACATCGCAACCACTAATGAGCTGGCC  
GCCCTCACGGCCTTCGTCATG**C**TGGCTCTGAAGGACATCGCAACCACTAATGAGCTGGCC  
\*\*\*\*\*.\*\*\*\*\*.\*\*\*\*\*.\*\*\*\*\*.\*\*\*\*\*.\*\*\*\*\*.\*\*\*\*\*.\*\*\*\*\*.\*\*\*\*\*.\*\*\*\*\*

Kotsiri et al SIPC  
Dreanno et al SIPC  
Zhang et al SIPC  
AACGGCTTCGCCTGCCTAGAGGACGGTCTTCTGCTCCCCAACAAGACCCTGTATTCGGAG  
AACGGCTTCGCCTGCCTAGAGGACGGTCTTCTGCTCCCCAACAAGACCCTGTATTCGGAG  
AACGG**T**TTTCGCCTG**T**CTAGAGGACGGTCTTCTGCTCCCCAACAAGACCCTGTATTCGGAG  
\*\*\*\*\*.\*\*\*\*\*.\*\*\*\*\*.\*\*\*\*\*.\*\*\*\*\*.\*\*\*\*\*.\*\*\*\*\*.\*\*\*\*\*.\*\*\*\*\*.\*\*\*\*\*

Kotsiri et al SIPC  
Dreanno et al SIPC  
Zhang et al SIPC  
ATTCTTTTGGCGTACACATACCTGAATATGGGCCAAGATGTCAAGGGGGAGAGGCTGGTG  
ATTCTTTTGGCGTACACATACCTGAATATGGGCCAAGATGTCAAGGGGGAGAGGCTGGTG  
ATTCTTTTGGCGTACACATAC**A**TGAATATGGGCCAAGATGTCAAGGG**A**GAGAGGCTGGTG  
\*\*\*\*\*.\*\*\*\*\*.\*\*\*\*\*.\*\*\*\*\*.\*\*\*\*\*.\*\*\*\*\*.\*\*\*\*\*.\*\*\*\*\*.\*\*\*\*\*.\*\*\*\*\*

Kotsiri et al SIPC  
Dreanno et al SIPC  
Zhang et al SIPC  
AACAAGCTCATGTGCGAAGGCCAAACGCGAAGGAGATGACATCCTCTACTGGGAGGGCGAC  
AACAAGCTCATGTGCGAAGGCCAAACGCGAAGGAGATGACATCCTCTACTGGGAGGGCGAC  
AACAAGCTCATGTGCGAAGGCCAAACGCG**G**AGATGACATCCTCTACTGGGAGGGCGAC  
\*\*\*\*\*.\*\*\*\*\*.\*\*\*\*\*.\*\*\*\*\*.\*\*\*\*\*.\*\*\*\*\*.\*\*\*\*\*.\*\*\*\*\*.\*\*\*\*\*.\*\*\*\*\*

Kotsiri et al SIPC  
Dreanno et al SIPC  
Zhang et al SIPC  
CG**T**GATTCTCT**A**TTTCGGTGAAGCCGAGCCGTGGACGTGGAGATGACTGCCTACATGGCC**C**  
CGCGATTCTCTCT**T**GGTGAAGCCGAGCCGTGG**A**TGT**C**GAGATGACTGCCTACATGGCT  
CGCGATTCTCTCTTCGGTGAAGCCG**G**CCGTGGACGTGGAGATGACTGCCTACATGGCT  
\*\*.\*.\*\*\*\*\*.\*\*\*.\*.\*\*\*\*\*.\*\*\*\*\*.\*\*\*\*\*.\*.\*.\*\*\*\*\*.\*\*\*\*\*.\*\*\*\*\*.\*.

Kotsiri et al SIPC  
Dreanno et al SIPC  
Zhang et al SIPC  
CTCTCGCTGATGCACATCTCTGGAAAGGGCA**C**ATGGAGGAGGCAGCGCG**T**GCCATTTCGC  
CTCTCGCTGATGCACATCTC**G**GAAAGGGCAATATGGAGGAGGCAGCGCGCCATTTCGC  
CTCTCGCTGATGCACATCTCTGGAAAGGG**T**AATATGGAGGAGGCAGCGCGCCATTTCGC  
\*\*\*\*\*.\*\*\*\*\*.\*\*\*\*\*.\*.\*.\*\*\*\*\*.\*\*\*\*\*.\*\*\*\*\*.\*.\*\*\*\*\*.\*\*\*\*\*.\*\*\*\*\*

Kotsiri et al SIPC  
Dreanno et al SIPC  
Zhang et al SIPC  
TGGATCAACAC**T**CAGAGGAACAGCAACGGAGGCTTCAAATCCAC**C**CAGGACACCATTGTT  
TGGATCAACACCCAGAGGAACAGCAACGG**G**GG**T**TCAAATCCACTCAGGACACCATTGTT  
TGGATCAACACGCAGAGGAACAGCAACGGAGGCTTCAAATCCACTCAGGACACCATTGTT  
\*\*\*\*\*.\*\*\*\*\*.\*\*\*\*\*.\*.\*.\*\*\*\*\*.\*\*\*\*\*.\*\*\*\*\*.\*.\*\*\*\*\*.\*\*\*\*\*.\*\*\*\*\*

Kotsiri et al SIPC  
Dreanno et al SIPC  
Zhang et al SIPC  
GCTGTGGAAGCTCTGTGAGAGTTTCG**C**A**T**CTCGCACGTTTCGCTCTGATCTGGCCACGAGT  
GCTGTGGAAGC**C**CTGTGAGAGTTTCGCGTCTCGCACGTTTCGCTCTGATCTGGCCACGAGT  
GCTGTGGAAGCTCTGTGAGAGTTTCGCGTCTCGCACGTTTCGCTCTGATCTGGCCACGAGT  
\*\*\*\*\*.\*\*\*\*\*.\*\*\*\*\*.\*\*\*\*\*.\*\*\*\*\*.\*\*\*\*\*.\*\*\*\*\*.\*\*\*\*\*.\*\*\*\*\*.\*\*\*\*\*

Kotsiri et al SIPC  
Dreanno et al SIPC  
Zhang et al SIPC  
GTGTCTGTGACTGCTGGAGGAGAGACTGTTTCAGCGGATGGTGGATGGAGACAACAGACTG  
GTGTCTGT**A**ACTGCTGGAGGAGAGACTGTTTCAGCGGATGGTGGATGGAGACAACAGACTG  
GTGTCTGTGACTGCTGGAGGAGAGACTGTTTCAGCGGATGGTGGATGGAGACAACAGACTG  
\*\*\*\*\*.\*\*\*\*\*.\*\*\*\*\*.\*\*\*\*\*.\*\*\*\*\*.\*\*\*\*\*.\*\*\*\*\*.\*\*\*\*\*.\*\*\*\*\*.\*\*\*\*\*

Kotsiri et al SIPC  
Dreanno et al SIPC  
Zhang et al SIPC  
CTGTATCAGGAGTCCAAGGTGCCAGACCTGACGCTGCCTGGCACCATGAACTTCGATGTC  
CTGTATCAGGAGTCCAAGGTGCCAGACCTGACGCTGCCTGGCACCATGAACTTCGATGTC  
CTGTATCAGGAGTCCAAGGTGCCAGACCTGACGCTGCCTGGCACCATGAACTTCGATGTC  
\*\*\*\*\*.\*\*\*\*\*.\*\*\*\*\*.\*\*\*\*\*.\*\*\*\*\*.\*\*\*\*\*.\*\*\*\*\*.\*\*\*\*\*.\*\*\*\*\*.\*\*\*\*\*

Kotsiri et al SIPC  
Dreanno et al SIPC  
Zhang et al SIPC  
AGTCCGCTGGCTGCGTGGT**G**TACCAGAGTATCTTCCGATTCAGCAGCACTCTAGAGGTG  
AGTCCGCTGGCTGCGTGGTCTACCAGAGTAT**T**TCCG**G**TTTCAGCAGCACTCT**C**GAGGTG  
AGTCCGCTGGCTGCGTGGTCTACCAGAGTATCTTCCGATTCAGCAGCACTCTAGAGGTG  
\*\*\*\*\*.\*\*\*\*\*.\*\*\*\*\*.\*\*\*\*\*.\*\*\*\*\*.\*\*\*\*\*.\*\*\*\*\*.\*\*\*\*\*.\*\*\*\*\*.\*\*\*\*\*

Kotsiri et al SIPC  
Dreanno et al SIPC  
Zhang et al SIPC  
CCCGACCCTGCCTTCTCTCTCGGTGTGGCTGCCAAGAAGCGAGGCCGTA**C**TGGCTACGAG  
CCCGACCCTGCCTTCTCTCTCGGTGTGGCTGCCAAGAAGCGAGGCCGTA**C**TGGCTACGAG  
CCCGACCCTGCCTT**C**CTCTCGGTGTGGCTGCCAAGAAGCGAGG**T**CGTAC**C**GGCTACGAG  
\*\*\*\*\*.\*\*\*\*\*.\*\*\*\*\*.\*\*\*\*\*.\*\*\*\*\*.\*\*\*\*\*.\*\*\*\*\*.\*\*\*\*\*.\*\*\*\*\*.\*\*\*\*\*

|                    |                                                               |
|--------------------|---------------------------------------------------------------|
| Kotsiri et al SIPC | CTGGAAGTATGCACCAGCTTCCTCCGAAACTCTGGCGCCGTGGACCGCGCCATCCTGGAA  |
| Dreanno et al SIPC | CTGGAAGTATGCACCAGCTTCCTCCGAAACTCTGGCGCCGTGGACCGCGCCATTCTGGAA  |
| Zhang et al SIPC   | CTGGAAGTCTGCACCAGCTTCCTCCGAAACTCTGGCGCCGTGGACCGCGCCATTCTGGAA  |
|                    | ***** .*****                                                  |
| Kotsiri et al SIPC | ACGGAACTGCCCTCTGGCTATGTTGCTGTGGACAGCACCCCTGAGGGACCTGCGCAGAGGC |
| Dreanno et al SIPC | ACGGAACTGCCCTCCGGCTATGTTGCTGTGGACAGCACCCCTGAGGGACCTGCGCAGAGGC |
| Zhang et al SIPC   | ACGGAACTGCCCTCCGGCTATGTTGCTGTGGACAGCACCCCTGAGGGACCTGCGCAGAGGC |
|                    | ***** .*****                                                  |
| Kotsiri et al SIPC | TCAGCTGTTTCGCAGCTATGAGATCAAGGAAGGTAAAGTGATCTTCACACTGCAAGGAGTG |
| Dreanno et al SIPC | TCAGCTGTTTCGCAGCTATGAGATCAAGGAAGGTAAAGTGATCTTCACACTGCAAGGAGTG |
| Zhang et al SIPC   | TCAGCTGTTTCGCAGCTATGAGATCAAGGAAGGTAAAGTGATCTTCACACTGCAAGGAGTG |
|                    | *****                                                         |
| Kotsiri et al SIPC | GCCGAGGATAAGACCTGTCTGGAGTTCGCGATTATTCAGGAGAACGAAGTTGAGCAGCTG  |
| Dreanno et al SIPC | GCCGAGGATAAGACCTGTCTGGAGTTCGCGATTATTCAGGAGAACGAAGTTGAGCAGCTG  |
| Zhang et al SIPC   | GCCGAGGATAAGACCTGTCTGGAGTTCGCGATTATTCAGGAGAACGAAGTTGAGCAGCTG  |
|                    | *****                                                         |
| Kotsiri et al SIPC | AAGCCGTCCATTGTGAAGGTGCACGACTTCTACCGTCCTGAGGAGAGGAACATTCAGGAG  |
| Dreanno et al SIPC | AAGCCGTCCATTGTGAAGGTGCACGACTTCTACCGTCCTGAGGAGAGGAACATTCAGGAG  |
| Zhang et al SIPC   | AAGCCGTCCATTGTGAAGGTGCACGACTTCTACCGTCCTGAGGAGAGGAACATTCAGGAG  |
|                    | *****                                                         |
| Kotsiri et al SIPC | TACGAGCTGACTCCCGCTGCTTAG                                      |
| Dreanno et al SIPC | TACGAGCTGACTCCCGCTGCTTAG                                      |
| Zhang et al SIPC   | TACGAGCTGACTCCCGCTGCTTAG                                      |
|                    | *****                                                         |

**Table S2:** Alignment of the amino acid sequences from 3 *A. amphitrite* SIPC proteins using the multiple sequence alignment software MAFFT at <http://www.ebi.ac.uk/Tools/msa/mafft/>. Bold letters in red indicate the differences between the amino acid sequences.

CLUSTAL format alignment by MAFFT FFT-NS-i (v7.215)

|                    |                                                                                                                                                                 |
|--------------------|-----------------------------------------------------------------------------------------------------------------------------------------------------------------|
| Kotsiri et al SIPC | M <b>GRA</b> I <b>V</b> LLVALATASAVKVPESGYLFTAPKVLQAGTDERACLSLFLNLPGNRALKLFY                                                                                    |
| Dreanno et al SIPC | MGGP <b>V</b> VLLVALATASAVKVPESGYLFTAPKVLQAGTDERACLSLFLNLPGNRALKLFY                                                                                             |
| Zhang et al SIPC   | MGS-----VKVPESGYLFTAPKVLQAGTDERACLSLFLNLPGNRALKLFY                                                                                                              |
|                    | ** *****                                                                                                                                                        |
| Kotsiri et al SIPC | ERDVPSSSLSTTLDKSDFLLFETNTAVPDSVAENGEYCFDITIPSKVVAR <b>S</b> ADMHMELTAG                                                                                          |
| Dreanno et al SIPC | ERDVPSSSLSTTLDKSDFLLFETNTAVPDSVAENGEYCFDITIPSKVVAR <b>S</b> ADMHMELTAG                                                                                          |
| Zhang et al SIPC   | ERDVPSSSLSTTLDKSDFLLFETNTAVPDSVAENGEYCFDITIPSKVVAR <b>S</b> ADMHMELTAG                                                                                          |
|                    | *****                                                                                                                                                           |
| Kotsiri et al SIPC | EGVWKEESV <b>V</b> TLKSETFLTLVQTDKSKYQPGQKVLFRVVTL <b>S</b> HDLTALNNDLNEVW <b>V</b> TTP                                                                         |
| Dreanno et al SIPC | EGVWKEESV <b>V</b> TLKSETFLTLVQTDKSKYQPGQKVLFRVVTL <b>S</b> HDLTALNNDLNEVW <b>I</b> TTP                                                                         |
| Zhang et al SIPC   | EGVWKEESV <b>V</b> TLKSETFLTLVQTDKSKYQPGQKVLFRVVTL <b>S</b> HDLTALNNDLNEVW <b>I</b> TTP                                                                         |
|                    | *****:***                                                                                                                                                       |
| Kotsiri et al SIPC | DN <b>V</b> RVAQWKNVK <b>T</b> NTGMVQLELQLTEEPPLGSWTIH <b>V</b> RTTQDITYTKRFTVEEYVLPTFEL                                                                        |
| Dreanno et al SIPC | DNIRVAQWKNVK <b>T</b> NTGMVQLELQLTEEPPLGSWTIHVLT <b>T</b> QDITYTKRFTVEEYVLPTFEL                                                                                 |
| Zhang et al SIPC   | DNIRVAQWKNVK <b>T</b> NTGMVQLELQLTEEPPLGSWTIHVLT <b>T</b> QDITYTKRFTVEEYVLPTFEL                                                                                 |
|                    | **.:*****                                                                                                                                                       |
| Kotsiri et al SIPC | EIEAPESLESNEK <b>T</b> VTVKVCAKYTFGKPLIAANVSINATARGIGSWQYNNN <b>K</b> DLLRNISD                                                                                  |
| Dreanno et al SIPC | EIEAPESLESNEK <b>T</b> VTVKVCAKYTFGKPLIAANVSINATARGIGSWQYNNN <b>P</b> DLLRNISD                                                                                  |
| Zhang et al SIPC   | EIEAPESLESNEK <b>T</b> VTVKVCAKYTFGKPLIAANVSINATARGIGSWQYNNN <b>P</b> DLLRNISD                                                                                  |
|                    | *****                                                                                                                                                           |
| Kotsiri et al SIPC | YQFSDEQGC <b>A</b> IFDLVSKIGIGHRNIGGGNTV <b>I</b> ITIDVEEQGTGLRQVEVKEVSQAYS <b>F</b> I                                                                          |
| Dreanno et al SIPC | YQFSDEQGC <b>A</b> IFDLVSKIGIGHRNIGGGNTV <b>I</b> ITIDVEEQGTGLRQVEVKEVSQAYS <b>F</b> I                                                                          |
| Zhang et al SIPC   | YQFSDEQGC <b>A</b> IFDLVSKIGIGHRNIGGGNTV <b>I</b> ITIDVEEQGTGLRQVEVKEVSQAYS <b>F</b> I                                                                          |
|                    | *****                                                                                                                                                           |
| Kotsiri et al SIPC | NLRQSDNAQ <b>K</b> FLKPKLPFYGEY <b>T</b> LSMRDGKAAKNEIVKVCYTAKYK <b>E</b> RVISDEKKPT <b>P</b> DD                                                                |
| Dreanno et al SIPC | NLRQSDNAQ <b>K</b> FLKPKLPFYGEY <b>T</b> LSMRDGKAAKNEIVKVCYTAKYK <b>E</b> RVISDEKKPT <b>P</b> DD                                                                |
| Zhang et al SIPC   | NLRQSDNAQ <b>K</b> FLKPKLPFYGEY <b>T</b> LSMRDGKAAKNEIVKVCYTAKYK <b>E</b> RVISDEKKPT <b>P</b> DD                                                                |
|                    | *****                                                                                                                                                           |
| Kotsiri et al SIPC | PVYSTHKKY <b>E</b> SHVKTEFGY <b>T</b> PPFFWETSEPNRRTTGGECREYK <b>T</b> DENGRIVYY <b>I</b> PPQ <b>A</b> E <b>D</b> I                                             |
| Dreanno et al SIPC | PVYSTHKKY <b>E</b> SHVKTEFGY <b>T</b> PPFFWETSEPNRRTTGGECREYK <b>T</b> DENGRIVYY <b>I</b> PPQ <b>A</b> E <b>D</b> I                                             |
| Zhang et al SIPC   | PVYSTHKKY <b>E</b> SHVKTEFGY <b>T</b> PP <b>L</b> FWETSEPNRRTTGGECREYK <b>T</b> DENGRIVYY <b>I</b> PPQ <b>A</b> E <b>D</b> I                                    |
|                    | *****:*****                                                                                                                                                     |
| Kotsiri et al SIPC | DSIDISTSTSVGGSDSDSS <b>H</b> STLT <b>A</b> FFSPSHSYLS <b>I</b> D <b>T</b> HELPEQLPCSGD <b>V</b> TVKLLST <b>E</b> EG                                             |
| Dreanno et al SIPC | DSIDISTSTSVGGSDSDSS <b>H</b> STLT <b>A</b> FFSPSHSYLS <b>I</b> DAHELPEQLPCSGD <b>V</b> TVKLLST <b>E</b> EG                                                      |
| Zhang et al SIPC   | DSIDISTSTSVGGSDSDSS <b>H</b> STLT <b>A</b> FFSPSHSYLS <b>I</b> DAHELPEQLPCSGD <b>V</b> TVKLLST <b>E</b> EG                                                      |
|                    | *****:*****                                                                                                                                                     |
| Kotsiri et al SIPC | PVPAMVYK <b>I</b> LSRGK <b>I</b> IKAGNMNT <b>N</b> TL <b>T</b> FPVLPKMGPE <b>F</b> KLLVYY <b>I</b> KESGEV <b>V</b> S <b>D</b> SRV <b>F</b> KV                   |
| Dreanno et al SIPC | PVPAMVYK <b>I</b> LSRGK <b>I</b> IKAGNMNT <b>N</b> TL <b>T</b> FPVLPKMGPE <b>F</b> KLLVYY <b>I</b> KESGEV <b>V</b> S <b>D</b> SRV <b>F</b> KV                   |
| Zhang et al SIPC   | PVPAMVYK <b>I</b> LSRGK <b>I</b> IKAGNMNT <b>N</b> TL <b>T</b> FPVLPKMGPE <b>F</b> KLLVYY <b>I</b> KESGEV <b>V</b> S <b>D</b> SRV <b>F</b> KV                   |
|                    | *****                                                                                                                                                           |
| Kotsiri et al SIPC | DKCFPNTVQ <b>V</b> SWDQ <b>K</b> TVKPGDS <b>A</b> SFTVRASP <b>N</b> SVCG <b>I</b> SAVDK <b>S</b> T <b>E</b> LLG <b>T</b> SNQ <b>I</b> TL <b>D</b> TV <b>F</b> S |
| Dreanno et al SIPC | DKCFPNTVQ <b>V</b> SWDQ <b>K</b> TVKPGDS <b>A</b> SFTVRASP <b>N</b> SVCG <b>I</b> SAVDK <b>S</b> T <b>E</b> LLG <b>T</b> SNQ <b>I</b> TL <b>D</b> TV <b>F</b> S |
| Zhang et al SIPC   | DKCFPNTVQ <b>V</b> SWDQ <b>K</b> TVKPGDS <b>A</b> SFTVRASP <b>N</b> SVCG <b>I</b> SAVDK <b>S</b> T <b>E</b> LLG <b>T</b> SNQ <b>I</b> TL <b>D</b> TV <b>F</b> S |
|                    | *****                                                                                                                                                           |

Kotsiri et al SIPC  
Dreanno et al SIPC  
Zhang et al SIPC  
KLQQFIINSFESPNQVRSDGDYCRELQLSLVDTLRSGGAT**A**AELTGQSTPEGTPPESETSG  
KLQQFIINSFESPNQVRSDGDYCRELQLSLVDTLRSGGAT**V**AELTGQSTPEGTPPESETSG  
KLQQFIINSFESPNQVRSDGDYCRELQLSLVDTLRSGGAT**V**AELTGQSTPEGTPPESETSG  
\*\*\*\*\*.\*\*\*\*\*

Kotsiri et al SIPC  
Dreanno et al SIPC  
Zhang et al SIPC  
AA**Q**SSLFIPPPTRSQRFRTRD**D**DAIKPFDEAGFLVLSNLALETRPCYKRV**Q**AKELPELTE  
AAHSSLFIPPPTRSQRFRTRDREDAIKPFDEAGFLVLSNLALETRPCYKRV**E**AKELPELTE  
AAHSSLFIPPPTRSQRFRTRDREDAIKPFDEAGFLVLSNLALETRPCYKRV**Q**AKELPELTE  
\*\*.\*:\*\*\*\*\*.\*:\*\*\*\*\*

Kotsiri et al SIPC  
Dreanno et al SIPC  
Zhang et al SIPC  
DKIQASR**G**GEEELLDDLDSPVPALAFSKEADSRFAAEGGVSGGGGAAPPQEDQVRDFF  
DKIQASRDGEEELLDDLDSPVPALAFSKEADSRFAAEGGVSGGGGAAPPQEDQVRDFF  
DKIQASRDGEEELLDDLDSPVPALAFSKEADSRFAAEGGVSGGGGAAPPQEDQVRDFF  
\*\*\*\*\*.\*\*\*\*\*

Kotsiri et al SIPC  
Dreanno et al SIPC  
Zhang et al SIPC  
PEAF**L**FSIETLDAEGVKTVTSEMPDTITSWVGS**A**ICTNSKDGFGISNKTSITTFKPF**F**TE  
PEAF**L**FSIETLDAEGVKTVTSEMPDTITSWVGS**A**ICTNSKDGFGISNKTSITTFKPF**F**TE  
PEAF**P**FSIETLDAEGVKTVTSEMPDTITSWVGS**A**ICTNSKDGFGISNKTSITTFKPF**F**TE  
\*\*\*\*.\*\*\*\*\*

Kotsiri et al SIPC  
Dreanno et al SIPC  
Zhang et al SIPC  
VSLPYS**M**KRGEILSMSVSVFNFLDSSLSVYLEVGASDQYEISGEVAMGLCIAAGRTEV**K**S  
VSLPYS**M**KRGEILSMSVSVFNFLDSSLSVYLEVGASDQYEISGEVAMGLCIAAGRTEV**R**S  
VSLPYS**M**KRGEILSMSVSVFNFLDSSLSV**P**EVGASDQYEISGEVAMGL**R**IAAGRTEV**R**S  
\*\*\*\*\*.\*\*\*\*\*

Kotsiri et al SIPC  
Dreanno et al SIPC  
Zhang et al SIPC  
FPVN**F**LGLGEVNITVTARAQDGYCDEGNTIAPGSDTVIRPIVVKPEGFPQEVTHSRFICL  
FPVN**F**LGLGEVNITVTARAQDGYCDEGNTIAPGSDTVIRPIVVKPEGFPQEVTHSRFICL  
FPVN**F**LGLGEVNITVTARAQDGYCDEGNTIAPGSDTVIRPIVVKPEGFPQEVTHSRFICL  
\*\*\*\*\*

Kotsiri et al SIPC  
Dreanno et al SIPC  
Zhang et al SIPC  
DKDDDHHTETVNL**P**VPEGLVPDSQRAYFSVIGDLL**G**PT**F**QGLEGLIKSPTGAGEPNMIT  
DKDDDHHTETVNL**P**VPEGLVPDSQRAYFSVIGDLL**G**Q**T**FQGLEGLIKSPTGAGEPNMIT  
DKDDDHHTETVNL**P**VPEGLVPDSQRAYFSVIGDLL**G**Q**T**FQGLEGLIKSPTGAGEPNMIT  
\*\*\*\*\*

Kotsiri et al SIPC  
Dreanno et al SIPC  
Zhang et al SIPC  
LVPNIYIRRYLETT**G**QLNERQRRQLEHN**M**KSGYQRQLRFRRYDGSFSSYGNEDPQGS**M**WL  
LVPNIYIRRYLETT**G**QLNERQRRQLEHN**M**KSGYQRQLRFRRYDGSFSSYGNEDPQGS**M**WL  
LVPNIYIRRYLETT**G**QLNERQRRQLEHN**M**KSGYQRQLRFRRYD**G****P**FSSYGNEDPQGS**M**WL  
\*\*\*\*\*.\*\*\*\*\*

Kotsiri et al SIPC  
Dreanno et al SIPC  
Zhang et al SIPC  
TAFV**V**KAFREASEYIEIDETI**I**INKAKDWILKKQNTTGC**F**PRFGELI**H**KELKGGTERG**G**EA  
TAFV**V**KAFREASEYIEIDETI**I**INKAKDWILKKQNTTGC**F**PRFGELI**H**KELKGGTERG**G**EA  
TAFV**V**KAFREASEYIEIDETI**I**INKAKDWILKKQNTTGC**F**PRFGELI**H**KELKGGTERG**G**EA  
\*\*\*\*\*

Kotsiri et al SIPC  
Dreanno et al SIPC  
Zhang et al SIPC  
AL**T**AFV**M**LAL**K**DIATT**N**ELANGFACLED**G**LL**L**PN**K**TLYSE**I**LLAYTYL**N**M**G**QDV**K**GER**L**V  
AL**T**AFV**M**LAL**K**DIATT**N**ELANGFACLED**G**LL**L**PN**K**TLYSE**I**LLAYTYL**N**M**G**QDV**K**GER**L**V  
AL**T**AFV**M**LAL**K**DIATT**N**ELANGFACLED**G**LL**L**PN**K**TLYSE**I**LLAYTY**M****N**M**G**QDV**K**GER**L**V  
\*\*\*\*\*.\*:\*\*\*\*\*

Kotsiri et al SIPC  
Dreanno et al SIPC  
Zhang et al SIPC  
N**K**LM**S**KAKREGDD**I**LYWEGDRD**S**LF**G**GSRAVD**V**EMTAY**M**AL**S**LM**H**IS**G**K**N**M**E**E**A**AR**A**IR  
N**K**LM**S**KAKREGDD**I**LYWEGDRD**S**LF**G**GSRAVD**V**EMTAY**M**AL**S**LM**H**IS**G**K**N**M**E**E**A**AR**A**IR  
N**K**LM**S**KAKREGDD**I**LYWEGDRD**S**LF**G**GSRAVD**V**EMTAY**M**AL**S**LM**H**IS**G**K**N**M**E**E**A**AR**A**IR  
\*\*\*\*\*

Kotsiri et al SIPC  
Dreanno et al SIPC  
Zhang et al SIPC  
W**I**NT**Q**R**N**S**G**G**F**K**S**T**Q**D**T**I**V**A**V**E**A**L**S**E**F**A**S**R**T**F**A**S**D**L**A**T**S**V**S**V**T**A**G**G**E**T**V**Q**R**M**V**D**G**D**N**R**L**  
W**I**NT**Q**R**N**S**G**G**F**K**S**T**Q**D**T**I**V**A**V**E**A**L**S**E**F**A**S**R**T**F**A**S**D**L**A**T**S**V**S**V**T**A**G**G**E**T**V**Q**R**M**V**D**G**D**N**R**L**  
W**I**NT**Q**R**N**S**G**G**F**K**S**T**Q**D**T**I**V**A**V**E**A**L**S**E**F**A**S**R**T**F**A**S**D**L**A**T**S**V**S**V**T**A**G**G**E**T**V**Q**R**M**V**D**G**D**N**R**L**  
\*\*\*\*\*

Kotsiri et al SIPC  
Dreanno et al SIPC  
Zhang et al SIPC

LYQESKVPDLTLPGTMNFDVSPPGCVVYQSIFRFSSTLEVPDPAFSLGVAAKKRGRTGYE  
LYQESKVPDLTLPGTMNFDVSPPGCVVYQSIFRFSSTLEVPDPAFSLGVAAKKRGRTGYE  
LYQESKVPDLTLPGTMNFDVSPPGCVVYQSIFRFSSTLEVPDPAFPLGVAAKKRGRTGYE  
\*\*\*\*\*.\*\*\*\*\*

Kotsiri et al SIPC  
Dreanno et al SIPC  
Zhang et al SIPC

LEVCTSFLRNSGAVDRAILETELPSGYVAVDSTLRDLRRGSAVRSYEIKEGKVIFTLQGV  
LEVCTSFLRNSGAVDRAILETELPSGYVAVDSTLRDLRRGSAVRSYEIKEGKVIFTLQGV  
LEVCTSFLRNSGAVDRAILETELPSGYVAVDSTLRDLRRGSAVRSYEIKEGKVIFTLQGV  
\*\*\*\*\*

Kotsiri et al SIPC  
Dreanno et al SIPC  
Zhang et al SIPC

AEDKTCLEFRIIQENEVEQLKPSIVKVHDFYRPEERNIQEYELTPAA  
AEDKTCLEFRIIQENEVEQLKPSIVKVHDFYRPEERNIQEYELTPAA  
AEDKTCLEFRIIQENEVEQLKPSIVKVHDFYRPEERNIQEYELTPAA  
\*\*\*\*\*

|                     | <b>Kotsiri et al. SIPC<br/>(Nucleotides/Amino acids)</b> | <b>Dreanno et al. SIPC<br/>(Nucleotides/Amino acids)</b> | <b>Zhang et al. SIPC<br/>(Nucleotides/Amino acids)</b> |
|---------------------|----------------------------------------------------------|----------------------------------------------------------|--------------------------------------------------------|
| Kotsiri et al. SIPC |                                                          | 101/15                                                   | (105+44*)/(11+15*)                                     |
| Dreanno et al. SIPC | 101/15                                                   |                                                          | (61+44*)/(8+15*)                                       |
| Zhang et al. SIPC   | (105+44*)/(11+15*)                                       |                                                          |                                                        |

**Table S3:** Differences in the nucleotide and amino acid sequences between the 2 published sequences of SIPC (GenBank: AAR33079.1 and GenBank: AMR58954.1) and the recombinant SIPC described in this study. \*:The nucleotide and amino acid sequences deposited by Zhang et al. in GenBank: AMR58954.1 lacks the signal peptide sequence.

**Table S4:** List of primers used in this study.

| Primer Number | Sequence (5' → 3')                                                                                                           |
|---------------|------------------------------------------------------------------------------------------------------------------------------|
| 1             | CATGAGAATTCGCCACCATGGGTGGTCCCGTCGTCGTCCTACTGG                                                                                |
| 2             | CTGAGAATTCCTAAGCAGCGGGAGTCAGCTCGTACTCCTC                                                                                     |
| 3             | CGCTTTCGGGGACCTTGACCAGATCCTCTTCAGAGATGAGTTTCTGCTCGGCGCTTGCCGTCGCCAAG                                                         |
| 4             | CTTCGCGACGGCAAGCGCCGAGCAGAACTCATCTCTGAAGAGGATCTGGTCAAGGTCCCCGAAAGCG                                                          |
| 5             | AGCTATCTAGACTAGTGGTGATGGTGATGATGTCCTGAACCAGCAGCGGGAGTCAGCTCGTACTCCTGAA                                                       |
| 6             | AGATTCTTTTGGCGTACACATACCTGAATA                                                                                               |
| 7             | TCTCTGAAGAGGATCTGGGCATGCTCCCCGTCCCCGAAAGCG                                                                                   |
| 8             | CGCTTTCGGGGGACGGGGAGCATGCCAGATCCTCTTCAGAGA                                                                                   |
| 9             | AGCACGAATTCGGCATGCGGCCGGCCATGGTGAGCAAGGGCGAGGAGCTG                                                                           |
| 10            | ATCGAGAATTCGCATGCGTTCGAACTTGTACAGCTCGTCCATGCCGAGAGTGATCCCGGCGGCGG                                                            |
| 11            | GCTGACCCTGAAGCTCATCTGCACCACCGG                                                                                               |
| 12            | CCGGTGGTGCAGATGAGCTTCAGGGTCAGC                                                                                               |
| 13            | ACCACCCTCGGCTACGGCTGATGTGCTTCGCCCGCTACC                                                                                      |
| 14            | GGTAGCGGGCGAAGCACATCAGGCCGTAGCCGAGGGTGGT                                                                                     |
| 15            | ACGTCTATATCA <u>CG</u> CCGACAAG                                                                                              |
| 16            | CTTGTCGGCCGTGATATAGACGT                                                                                                      |
| 17            | ACGGCATCAAGGCGAACTTCAAGAT                                                                                                    |
| 18            | ATCTTGAAGTTCGCCTTGATGCCGT                                                                                                    |
| 19            | CATCGAGGACGGCGGCGTGCAGCTCGC                                                                                                  |
| 20            | GCGAGCTGCACGCCGCCGTCTCGATG                                                                                                   |
| 21            | CTACCTGAGCT <u>ACC</u> AGTCCGCCC                                                                                             |
| 22            | GGGCGGACTGGTAGCTCAGGTAG                                                                                                      |
| 23            | ACTATGAATTCACCGGTGCCACCATGGTGAGCAAGGGCGAGGAGCTGTTACCCGG                                                                      |
| 24            | ATCGACTCGAGTTAGTACAGCTCGTCCATGCCGAGAGTGATCC                                                                                  |
| 25            | TACCGAATTCGACGAGATGGGGCTACCGCTCCGGCTTTTGCTGCTGCTGCTGCTGCCGCC                                                                 |
| 26            | ATCATACCGGTCCCTGGGGAAGGGCCTTCAGGATGGCATTACCTCCTCGGCCACAGCT                                                                   |
| 27            | TCCGGTACCGAATTCGCCACCATGAACTTCCAAAACATATTCATATTCGTGGCGTTAATAT<br>TGGCGGTGTTTCGCGGGACAATCTCAGGCGGAGCAGAACTCATCTCTGAAGAGGATCTG |
| 28            | ATCAGGCATGCCCAAGCGTATTCTTCATCAACCTCAGGCAG                                                                                    |
| 29            | ATCAGGCATGCCCAAGCCGTTCTTCACAGAGGTGTCTCTGCCG                                                                                  |
| 30            | GATCAGCATGCCCGTTCTGCCAACATTTGAGCTGGAGATCGA                                                                                   |
| 31            | CATATGCATGCCCAAGTACAAGGAGAGGGTAATCAGTGACGA                                                                                   |
| 32            | CATATGCATGCCCTCGTACCTAAGCATCGACACGCACGAACTT                                                                                  |
| 33            | GATCAGCATGCCCGACAAGTGCTTCCCAACACGGTCCAGGTC                                                                                   |
| 34            | GATCAGCATGCCCTCCAACCTGGCCCTGGAGACTCGGCCCTGC                                                                                  |
| 35            | TCTGGGCATGCCCGAGGTGACCCACTCTCGTTTCATCTG                                                                                      |

|    |                                         |
|----|-----------------------------------------|
| 36 | TCTGGGCATGCCAGCACTCTAGAGGTGCCCCGACCCTGC |
| 37 | ACTGGACTAGTGGTGATGGTGATGATGTCCTGAAC     |
| 38 | CAAAACCAACACTGGCATGGTGCAGCTGGA          |
| 39 | TACATCAAGGAGAGTGGCGAAGTGGTCAGC          |
| 40 | CTTCAAGCCGTTCTTCACAGAGGTGTCTCT          |
| 41 | AGATTCCTTTGGCGTACACATACCTGAATA          |
| 42 | ACTGCAGTGTTTGTCTCAAACAGCAGGAAA          |
| 43 | ATGATCACCGTATTTCCGCCTCCAATATTA          |
| 44 | CCAGTGAAAGCTGCAGTTCCTGCAGTAAT           |
| 45 | CAACAATGGTGCCTGAGTGGATTTGAAAC           |
| 46 | TCACTTCTTGAGGGAATCCCTCTGGTTTGA          |



**Table S5**

| <b>Putiative N-linked glycosylation sites on recombinant SIPC</b> | <b>Probability score provided by the server</b> | <b>Server used:</b>                                                                 | <b>Supported by experimental evidence?</b> | <b>Comments</b>                                                          |
|-------------------------------------------------------------------|-------------------------------------------------|-------------------------------------------------------------------------------------|--------------------------------------------|--------------------------------------------------------------------------|
| N263                                                              | 0.76                                            | <a href="http://www.modpred.org/">http://www.modpred.org/</a>                       | Supported                                  | Present only in Tr.1                                                     |
| N285                                                              | 0.7531                                          | <a href="http://www.cbs.dtu.dk/services/Net">http://www.cbs.dtu.dk/services/Net</a> | Supported                                  | Present only in Tr.1                                                     |
| N289                                                              | 0.5656                                          | <a href="http://www.cbs.dtu.dk/services/Net">http://www.cbs.dtu.dk/services/Net</a> | Supported                                  | Present only in Tr.1                                                     |
| N302                                                              | 0.68                                            | <a href="http://www.modpred.org/">http://www.modpred.org/</a>                       | Supported                                  | Present only in Tr.1                                                     |
| N309                                                              | 0.6872                                          | <a href="http://www.cbs.dtu.dk/services/Net">http://www.cbs.dtu.dk/services/Net</a> | Supported                                  | Present only in Tr.1                                                     |
| N618                                                              | 0.64                                            | <a href="http://www.modpred.org/">http://www.modpred.org/</a>                       | Not supported                              | Tr.5 after deglycosylation does not have an apparent MW higher than Tr.6 |
| N899                                                              | 0.7683                                          | <a href="http://www.cbs.dtu.dk/services/Net">http://www.cbs.dtu.dk/services/Net</a> | Supported                                  | Tr.6 after deglycosylation has a higher MW than Tr.7                     |
| N984                                                              | 0.7800                                          | <a href="http://www.cbs.dtu.dk/services/Net">http://www.cbs.dtu.dk/services/Net</a> | Supported                                  | Tr.7 after deglycosylation has an apparent MW similar to its Calculated  |
| N1186                                                             | 0.65                                            | <a href="http://www.modpred.org/">http://www.modpred.org/</a>                       | Not supported                              | Tr.8 does not have an apparent MW higher than its Calculated             |
| N1246                                                             | 0.7153                                          | <a href="http://www.cbs.dtu.dk/services/Net">http://www.cbs.dtu.dk/services/Net</a> | Not supported                              | Tr.8 does not have an apparent MW higher than its Calculated             |
| N1341                                                             | 0.74                                            | <a href="http://www.modpred.org/">http://www.modpred.org/</a>                       | Not supported                              | Tr.8 does not have an apparent MW higher than its Calculated             |

| Putiative O-linked glycosylation sites on recombinant SIPC | Probability score provided by the server | Server used:                                                                        | Supported by experimental evidence? | Comments                                                     |
|------------------------------------------------------------|------------------------------------------|-------------------------------------------------------------------------------------|-------------------------------------|--------------------------------------------------------------|
| N1462                                                      | 0.71                                     | <a href="http://www.modpred.org/">http://www.modpred.org/</a>                       | Not supported                       | Tr.8 does not have an apparent MW higher than its Calculated |
| S79                                                        | 0.80                                     | <a href="http://www.modpred.org/">http://www.modpred.org/</a>                       | Supported                           | Present only in full-length recombinant SIPC                 |
| T429                                                       | 0.780535                                 | <a href="http://www.cbs.dtu.dk/services/Net">http://www.cbs.dtu.dk/services/Net</a> | Supported                           | Present in Tr.3 onwards                                      |
| S436                                                       | 0.777751                                 | <a href="http://www.cbs.dtu.dk/services/Net">http://www.cbs.dtu.dk/services/Net</a> | Supported                           | Present in Tr.3 onwards                                      |
| T437                                                       | 0.5                                      | <a href="http://www.cbs.dtu.dk/services/Net">http://www.cbs.dtu.dk/services/Net</a> | Supported                           | Present in Tr.3 onwards                                      |
| S443                                                       | 0.635919                                 | <a href="http://www.cbs.dtu.dk/services/Net">http://www.cbs.dtu.dk/services/Net</a> | Supported                           | Present in Tr.3 onwards                                      |
| S498                                                       | 0.89                                     | <a href="http://www.modpred.org/">http://www.modpred.org/</a>                       | Supported                           | Present in Tr.3 onwards                                      |
| T499                                                       | 0.83                                     | <a href="http://www.modpred.org/">http://www.modpred.org/</a>                       | Supported                           | Present in Tr.3 onwards                                      |
| S500                                                       | 0.94                                     | <a href="http://www.modpred.org/">http://www.modpred.org/</a>                       | Supported                           | Present in Tr.3 onwards                                      |
| S502                                                       | 0.88                                     | <a href="http://www.modpred.org/">http://www.modpred.org/</a>                       | Supported                           | Present in Tr.3 onwards                                      |
| S708                                                       | 0.656591                                 | <a href="http://www.cbs.dtu.dk/services/Net">http://www.cbs.dtu.dk/services/Net</a> | Supported                           | Present in Tr.5 onwards                                      |
| T712                                                       | 0.749505                                 | <a href="http://www.cbs.dtu.dk/services/Net">http://www.cbs.dtu.dk/services/Net</a> | Supported                           | Present in Tr.5 onwards                                      |
| T717                                                       | 0.743219                                 | <a href="http://www.cbs.dtu.dk/services/Net">http://www.cbs.dtu.dk/services/Net</a> | Supported                           | Present in Tr.5 onwards                                      |
| S720                                                       | 0.922073                                 | <a href="http://www.cbs.dtu.dk/services/Net">http://www.cbs.dtu.dk/services/Net</a> | Supported                           | Present in Tr.5 onwards                                      |
| T721                                                       | 0.814289                                 | <a href="http://www.cbs.dtu.dk/services/Net">http://www.cbs.dtu.dk/services/Net</a> | Supported                           | Present in Tr.6 onwards                                      |
| T725                                                       | 0.530811                                 | <a href="http://www.cbs.dtu.dk/services/Net">http://www.cbs.dtu.dk/services/Net</a> | Supported                           | Present in Tr.6 onwards                                      |
| S728                                                       | 0.602923                                 | <a href="http://www.cbs.dtu.dk/services/Net">http://www.cbs.dtu.dk/services/Net</a> | Supported                           | Present in Tr.6 onwards                                      |
| T730                                                       | 0.595919                                 | <a href="http://www.cbs.dtu.dk/services/Net">http://www.cbs.dtu.dk/services/Net</a> | Supported                           | Present in Tr.6 onwards                                      |
| S731                                                       | 0.648028                                 | <a href="http://www.cbs.dtu.dk/services/Net">http://www.cbs.dtu.dk/services/Net</a> | Supported                           | Present in Tr.6 onwards                                      |
| S736                                                       | 0.751889                                 | <a href="http://www.cbs.dtu.dk/services/Net">http://www.cbs.dtu.dk/services/Net</a> | Supported                           | Present in Tr.6 onwards                                      |
| S737                                                       | 0.657497                                 | <a href="http://www.cbs.dtu.dk/services/Net">http://www.cbs.dtu.dk/services/Net</a> | Supported                           | Present in Tr.6 onwards                                      |
| T744                                                       | 0.858312                                 | <a href="http://www.cbs.dtu.dk/services/Net">http://www.cbs.dtu.dk/services/Net</a> | Supported                           | Present in Tr.6 onwards                                      |
| S746                                                       | 0.654746                                 | <a href="http://www.cbs.dtu.dk/services/Net">http://www.cbs.dtu.dk/services/Net</a> | Supported                           | Present in Tr.6 onwards                                      |
| T751                                                       | 0.685158                                 | <a href="http://www.cbs.dtu.dk/services/Net">http://www.cbs.dtu.dk/services/Net</a> | Supported                           | Present in Tr.6 onwards                                      |

|       |          |                                                                                     |               |                                                              |
|-------|----------|-------------------------------------------------------------------------------------|---------------|--------------------------------------------------------------|
| S822  | 0.669561 | <a href="http://www.cbs.dtu.dk/services/Net">http://www.cbs.dtu.dk/services/Net</a> | Supported     | Present in Tr.6 onwards                                      |
| S826  | 0.517458 | <a href="http://www.cbs.dtu.dk/services/Net">http://www.cbs.dtu.dk/services/Net</a> | Supported     | Present in Tr.6 onwards                                      |
| S835  | 0.797811 | <a href="http://www.cbs.dtu.dk/services/Net">http://www.cbs.dtu.dk/services/Net</a> | Supported     | Present in Tr.6 onwards                                      |
| S873  | 0.81     | <a href="http://www.modpred.org/">http://www.modpred.org/</a>                       | Supported     | Present in Tr.6 onwards                                      |
| T905  | 0.74     | <a href="http://www.modpred.org/">http://www.modpred.org/</a>                       | Supported     | Present in Tr.7 onwards                                      |
| S1372 | 0.523284 | <a href="http://www.cbs.dtu.dk/services/Net">http://www.cbs.dtu.dk/services/Net</a> | Not supported | Tr.8 does not have an apparent MW higher than its Calculated |
| T1376 | 0.543343 | <a href="http://www.cbs.dtu.dk/services/Net">http://www.cbs.dtu.dk/services/Net</a> | Not supported | Tr.8 does not have an apparent MW higher than its Calculated |
| S1438 | 0.5      | <a href="http://www.cbs.dtu.dk/services/Net">http://www.cbs.dtu.dk/services/Net</a> | Not supported | Tr.8 does not have an apparent MW higher than its Calculated |
| S1561 | 0.85     | <a href="http://www.modpred.org/">http://www.modpred.org/</a>                       | Not supported | Tr.8 does not have an apparent MW higher than its Calculated |

| <b>Putative C-linked glycosylation sites on recombinant SIPC</b> | <b>Probability score provided by the server</b> | <b>Server used:</b> | <b>Supported by experimental evidence?</b> | <b>Comments</b> |
|------------------------------------------------------------------|-------------------------------------------------|---------------------|--------------------------------------------|-----------------|
|------------------------------------------------------------------|-------------------------------------------------|---------------------|--------------------------------------------|-----------------|

None - <http://www.modpred.org/>

| <b>Putative Myristoylation sites on recombinant SIPC</b> | <b>Probability score provided by the server</b> | <b>Server used:</b> | <b>Supported by experimental evidence?</b> | <b>Comments</b> |
|----------------------------------------------------------|-------------------------------------------------|---------------------|--------------------------------------------|-----------------|
|----------------------------------------------------------|-------------------------------------------------|---------------------|--------------------------------------------|-----------------|

None - <http://mendel.imp.ac.at/myristate/SUPLpredictor.htm>

| <b>Putative Prenylation sites on recombinant SIPC</b> | <b>Probability score provided by the server</b> | <b>Server used:</b> | <b>Supported by experimental evidence?</b> | <b>Comments</b> |
|-------------------------------------------------------|-------------------------------------------------|---------------------|--------------------------------------------|-----------------|
|-------------------------------------------------------|-------------------------------------------------|---------------------|--------------------------------------------|-----------------|

None - <http://www.modpred.org/>

| <b>Putative GPI-anchor amidation sites on recombinant SIPC</b> | <b>Probability score provided by the server</b> | <b>Server used:</b>                                           | <b>Supported by experimental evidence?</b> | <b>Comments</b> |
|----------------------------------------------------------------|-------------------------------------------------|---------------------------------------------------------------|--------------------------------------------|-----------------|
| N1323                                                          | 0.63                                            | <a href="http://www.modpred.org/">http://www.modpred.org/</a> |                                            |                 |
| N1341                                                          | 0.87                                            | <a href="http://www.modpred.org/">http://www.modpred.org/</a> |                                            |                 |

Table S6

| SIPC or truncated fragment name | Calculated MW of SIPC and its truncated fragments | Calculated MW of SIPC and its truncated fragments from Western blots | SEM  | N | Differences between calculated and Calculated MW and its truncated fragments from | SEM  | N | Reduction in MW by deglycosylation assays | SEM  | N | N-linked glycans | Small glycans | O-linked glycans | Other post-translational modifications |
|---------------------------------|---------------------------------------------------|----------------------------------------------------------------------|------|---|-----------------------------------------------------------------------------------|------|---|-------------------------------------------|------|---|------------------|---------------|------------------|----------------------------------------|
| VSIPC                           | 199,159                                           | 246,4109                                                             | 2,37 | 3 | 47,2519                                                                           | 2,37 | 3 |                                           |      |   | 15               | 8             | 8                | 16                                     |
| SIPC                            | 171,453                                           | 217,7961                                                             | 2,2  | 7 | 46,34306                                                                          | 2,2  | 7 | 196,0638                                  | 4,08 | 3 | 15               | 8             | 8                | 15                                     |
| Tr.1                            | 147,276                                           | 178,0196                                                             | 3,56 | 6 | 30,74362                                                                          | 3,56 | 6 |                                           |      |   | 15               | 8             | 8                | 0                                      |
| Tr.2                            | 134,108                                           | 153,4121                                                             | 1,62 | 7 | 19,8299                                                                           | 1,81 | 6 |                                           |      |   | 7                | 4             | 8                | 0                                      |
| Tr.3                            | 128,479                                           | 149,4574                                                             | 1,49 | 6 | 21,09269                                                                          | 1,26 | 7 |                                           |      |   | 7                | 5             | 9                | 0                                      |
| Tr.4                            | 116,219                                           | 133,2525                                                             | 2,47 | 6 | 17,0335                                                                           | 2,47 | 6 |                                           |      |   | 7                | 3             | 7                | 0                                      |
| Tr.5                            | 106,35                                            | 124,7959                                                             | 1,64 | 6 | 18,44593                                                                          | 1,64 | 6 | 113,4602                                  | 2,17 | 3 | 7                | 4             | 7                | 0                                      |
| Tr.6                            | 89,543                                            | 108,5631                                                             | 2,88 | 6 | 19,02005                                                                          | 2,88 | 6 | 94,64828                                  | 1,84 | 3 | 7                | 7             | 5                | 0                                      |
| Tr.7                            | 74,895                                            | 83,84607                                                             | 1,81 | 7 | 8,951066                                                                          | 1,81 | 7 | 76,80681                                  | 1,25 | 3 | 5                | 2             | 2                | 0                                      |
| Tr.8                            | 62,454                                            | 59,48821                                                             | 1,34 | 4 | -2,965797                                                                         | 1,34 | 4 |                                           |      |   | 0                | 0             | 0                | 0                                      |
| Tr.9                            | 17,316                                            | 37,46218                                                             | 0,44 | 4 | 20,14618                                                                          | 0,44 | 4 |                                           |      |   | 0                | 0             | 0                | 20                                     |

| Dataset 1 |      |      |       |        |       |       |
|-----------|------|------|-------|--------|-------|-------|
| Data      | Data | 1243 | 85    | 49     | 62    | 51    |
| Data      | Data | MW   | Nglyc | Deglyc | Oglyc | Other |
| 246       | A    | 199  | 15    | 8      | 8     | 16    |
| 218       | B    | 171  | 15    | 8      | 8     | 15    |
| 178       | C    | 147  | 15    | 8      | 8     | 0     |
| 153       | D    | 134  | 7     | 4      | 8     | 0     |
| 149       | E    | 128  | 7     | 5      | 9     | 0     |
| 133       | F    | 116  | 7     | 3      | 7     | 0     |
| 124       | G    | 106  | 7     | 4      | 7     | 0     |
| 108       | H    | 89   | 7     | 7      | 5     | 0     |
| 84        | I    | 74   | 5     | 2      | 2     | 0     |
| 60        | J    | 62   | 0     | 0      | 0     | 0     |
| 37        | K    | 17   | 0     | 0      | 0     | 20    |
